# Supplementary material for: Exploring the working range of automated standard dilution analysis of nutrient elements in foods by inductively coupled plasma optical emission spectrometry
Source: Royal Society of Chemistry journal article supplement (doi:10.1039/d2ja00346e), 2023-01-01
Supplement: d2ja00346e1.pdf [file d2ja00346e1.pdf]

**Exploring the Working Range of Automated Standard Dilution  
Analysis of Nutrient Elements in Foods by Inductively Coupled  
Plasma Optical Emission Spectrometry**

Jake A. Carter\*, Patrick J. Gray, Todor I. Todorov

U.S. Food and Drug Administration, Center for Food Safety and Applied Nutrition, Office  
of Regulatory Science

5001 Campus Drive, College Park, MD, 20740, USA

\*Corresponding author: [jake.carter@fda.hhs.gov](mailto:jake.carter@fda.hhs.gov)

## **Supplementary Information**

**Table S1.** Results from the analysis of 10 different reference materials presented in tabular format.

**Table S2.** Results from the analysis of four different fortified foods spiked at three levels each presented in tabular format.

**R Code**

Table S1.

| Element | Wavelength (nm) | Reference Material | Certificate | Figure of Merit Indicator | Conc. Mean (mg/kg) | Conc. Stdev. (mg/kg) | RSD (%) | Standard Concentration (mg/kg) | n | Z Score | Certificate Value (mg/kg) | Certificate Uncertainty (mg/kg) | Soln. Conc. Mean (mg/kg) | Soln. Conc. Stdev. (mg/kg) | Analytical Solution Detection Limit (ASDL) | Analytical Solution Quantitation Limit (ASQL) | Limit of Detection (LOD) | Limit of Quantitation (LOQ) |
|---------|-----------------|--------------------|-------------|---------------------------|--------------------|----------------------|---------|--------------------------------|---|---------|---------------------------|---------------------------------|--------------------------|----------------------------|--------------------------------------------|-----------------------------------------------|--------------------------|-----------------------------|
| Ca      | 315.887         | 1566b              | certified   |                           | 784                | 8.29                 | 1.06    | 9.8                            | 3 | -0.337  | 838                       | 20                              | 3.85                     | 0.178                      | 0.0286                                     | 0.0953                                        | 5.83                     | 19.4                        |
| Ca      | 315.887         | 1566b              | certified   |                           | 775                | 14.7                 | 1.9     | 9.8                            | 3 | -0.478  | 838                       | 20                              | 4.27                     | 0.568                      | 0.0286                                     | 0.0953                                        | 5.83                     | 19.4                        |
| Ca      | 315.887         | 1568b              | certified   |                           | 106                | 1.34                 | 1.26    | 9.8                            | 3 | -0.565  | 118.4                     | 3.1                             | 0.559                    | 0.0208                     | 0.0286                                     | 0.0953                                        | 5.83                     | 19.4                        |
| Ca      | 315.887         | 1577c              | certified   |                           | 116                | 1.43                 | 1.23    | 9.8                            | 3 | -0.801  | 131                       | 10                              | 0.557                    | 0.0509                     | 0.0286                                     | 0.0953                                        | 5.83                     | 19.4                        |
| Ca      | 315.887         | 1577c              | certified   |                           | 115                | 1.63                 | 1.42    | 9.8                            | 3 | -0.735  | 131                       | 10                              | 0.542                    | 0.0154                     | 0.0286                                     | 0.0953                                        | 5.83                     | 19.4                        |
| Ca      | 315.887         | 1577c              | certified   |                           | 115                | 0.587                | 0.51    | 9.8                            | 3 | -0.823  | 131                       | 10                              | 0.537                    | 0.00625                    | 0.0286                                     | 0.0953                                        | 5.83                     | 19.4                        |
| Ca      | 315.887         | 1845a              | certified   |                           | 2330               | 38.6                 | 1.66    | 9.8                            | 3 | -0.152  | 2369                      | 91                              | 12.4                     | 2.02                       | 0.0286                                     | 0.0953                                        | 5.83                     | 19.4                        |
| Ca      | 315.887         | 2976               | reference   |                           | 8650               | 2220                 | 25.7    | 9.8                            | 3 | 1.66    | 7600                      | 300                             | 44.7                     | 12.6                       | 0.0286                                     | 0.0953                                        | 5.83                     | 19.4                        |
| Ca      | 315.887         | 3233               | certified   |                           | 53900              | 4520                 | 8.39    | 9.8                            | 3 | 3.43    | 36910                     | 920                             | 275                      | 42.5                       | 0.0286                                     | 0.0953                                        | 5.83                     | 19.4                        |
| Ca      | 315.887         | 3233               | certified   |                           | 58800              | 10700                | 18.2    | 9.8                            | 3 | 3.85    | 36910                     | 920                             | 352                      | 93.3                       | 0.0286                                     | 0.0953                                        | 5.83                     | 19.4                        |
| Ca      | 315.887         | 3290               | certified   |                           | 11300              | 1090                 | 9.65    | 9.8                            | 3 | 0.534   | 11230                     | 600                             | 65.2                     | 8.7                        | 0.0286                                     | 0.0953                                        | 5.83                     | 19.4                        |
| Ca      | 315.887         | FDA cocoa          | certified   |                           | 1730               | 7.61                 | 0.44    | 9.8                            | 3 | 0.294   | 1677                      | 47                              | 8.32                     | 0.341                      | 0.0286                                     | 0.0953                                        | 5.83                     | 19.4                        |
| Ca      | 315.887         | dolt-4             | information |                           | 625                | 12.8                 | 2.05    | 9.8                            | 3 | NA      | 680                       | NA                              | 3.35                     | 0.317                      | 0.0286                                     | 0.0953                                        | 5.83                     | 19.4                        |
| Ca      | 315.887         | dorm-4             | certified   |                           | 2300               | 92.8                 | 4.03    | 9.8                            | 3 | 0.322   | 2360                      | 140                             | 11.7                     | 0.687                      | 0.0286                                     | 0.0953                                        | 5.83                     | 19.4                        |
| Cu      | 327.395         | 1566b              | certified   |                           | 68.1               | 0.631                | 0.927   | 0.98                           | 3 | -0.161  | 71.6                      | 1.6                             | 0.335                    | 0.0138                     | 0.00343                                    | 0.0114                                        | 0.699                    | 2.33                        |
| Cu      | 327.395         | 1566b              | certified   |                           | 67.2               | 1.16                 | 1.73    | 0.98                           | 3 | -0.335  | 71.6                      | 1.6                             | 0.37                     | 0.0481                     | 0.00343                                    | 0.0114                                        | 0.699                    | 2.33                        |
| Cu      | 327.395         | 1568b              | certified   | Trace                     | 1.62               | 0.149                | 9.2     | 0.98                           | 3 | -3.31   | 2.35                      | 0.16                            | 0.0086                   | 0.00107                    | 0.00343                                    | 0.0114                                        | 0.699                    | 2.33                        |
| Cu      | 327.395         | 1577c              | certified   |                           | 268                | 5.77                 | 2.15    | 0.98                           | 3 | 0.156   | 275.2                     | 4.6                             | 1.29                     | 0.135                      | 0.00343                                    | 0.0114                                        | 0.699                    | 2.33                        |
| Cu      | 327.395         | 1577c              | certified   |                           | 269                | 5.74                 | 2.13    | 0.98                           | 3 | 0.302   | 275.2                     | 4.6                             | 1.27                     | 0.0422                     | 0.00343                                    | 0.0114                                        | 0.699                    | 2.33                        |
| Cu      | 327.395         | 1577c              | certified   |                           | 265                | 3.56                 | 1.34    | 0.98                           | 3 | 0.119   | 275.2                     | 4.6                             | 1.24                     | 0.0111                     | 0.00343                                    | 0.0114                                        | 0.699                    | 2.33                        |
| Cu      | 327.395         | 1845a              | certified   | Trace                     | 1.41               | 0.195                | 13.8    | 0.98                           | 3 | -6.51   | 2.4                       | 0.11                            | 0.0075                   | 0.00134                    | 0.00343                                    | 0.0114                                        | 0.699                    | 2.33                        |
| Cu      | 327.395         | 2976               | certified   |                           | 3.21               | 0.172                | 5.36    | 0.98                           | 3 | -1.83   | 4.02                      | 0.33                            | 0.0165                   | 0.00129                    | 0.00343                                    | 0.0114                                        | 0.699                    | 2.33                        |
| Cu      | 327.395         | 3233               | certified   |                           | 3.12               | 0.0587               | 1.88    | 0.98                           | 3 | -1.99   | 3.97                      | 0.28                            | 0.0159                   | 0.00133                    | 0.00343                                    | 0.0114                                        | 0.699                    | 2.33                        |
| Cu      | 327.395         | 3233               | certified   |                           | 3.28               | 0.202                | 6.16    | 0.98                           | 3 | -1.71   | 3.97                      | 0.28                            | 0.0194                   | 0.000426                   | 0.00343                                    | 0.0114                                        | 0.699                    | 2.33                        |
| Cu      | 327.395         | 3290               | certified   |                           | 15.6               | 0.218                | 1.4     | 0.98                           | 3 | -1.21   | 18.35                     | 0.64                            | 0.0912                   | 0.0229                     | 0.00343                                    | 0.0114                                        | 0.699                    | 2.33                        |
| Cu      | 327.395         | FDA cocoa          | certified   |                           | 42.7               | 0.38                 | 0.89    | 0.98                           | 3 | 0.0887  | 42.28                     | 2.06                            | 0.205                    | 0.00827                    | 0.00343                                    | 0.0114                                        | 0.699                    | 2.33                        |
| Cu      | 327.395         | dolt-4             | certified   |                           | 29.8               | 0.275                | 0.923   | 0.98                           | 3 | -0.0381 | 31.2                      | 1.1                             | 0.16                     | 0.0133                     | 0.00343                                    | 0.0114                                        | 0.699                    | 2.33                        |
| Cu      | 327.395         | dorm-4             | certified   |                           | 13.9               | 0.365                | 2.63    | 0.98                           | 3 | -0.643  | 15.7                      | 0.46                            | 0.0708                   | 0.00315                    | 0.00343                                    | 0.0114                                        | 0.699                    | 2.33                        |

|    |         |              |             |       |      |       |      |   |         |        |      |        |         |        |        |      |      |
|----|---------|--------------|-------------|-------|------|-------|------|---|---------|--------|------|--------|---------|--------|--------|------|------|
| Fe | 238.204 | 1566b        | certified   | 196   | 2.76 | 1.41  | 0.98 | 3 | -0.159  | 205.8  | 6.8  | 0.962  | 0.0418  | 0.0055 | 0.0183 | 1.12 | 3.74 |
| Fe | 238.204 | 1566b        | certified   | 198   | 4.78 | 2.41  | 0.98 | 3 | -0.102  | 205.8  | 6.8  | 1.09   | 0.139   | 0.0055 | 0.0183 | 1.12 | 3.74 |
| Fe | 238.204 | 1568b        | certified   | 6.97  | 1.04 | 14.9  | 0.98 | 3 | -0.0518 | 7.42   | 0.44 | 0.0368 | 0.00533 | 0.0055 | 0.0183 | 1.12 | 3.74 |
| Fe | 238.204 | 1577c        | certified   | 202   | 7.98 | 3.95  | 0.98 | 3 | 0.576   | 197.94 | 0.65 | 0.969  | 0.0625  | 0.0055 | 0.0183 | 1.12 | 3.74 |
| Fe | 238.204 | 1577c        | certified   | 199   | 5.22 | 2.62  | 0.98 | 3 | 0.57    | 197.94 | 0.65 | 0.937  | 0.0226  | 0.0055 | 0.0183 | 1.12 | 3.74 |
| Fe | 238.204 | 1577c        | certified   | 196   | 1.88 | 0.959 | 0.98 | 3 | 0.381   | 197.94 | 0.65 | 0.919  | 0.00633 | 0.0055 | 0.0183 | 1.12 | 3.74 |
| Fe | 238.204 | 1845a        | certified   | 81.4  | 2.33 | 2.86  | 0.98 | 3 | -0.193  | 83     | 2.3  | 0.433  | 0.0668  | 0.0055 | 0.0183 | 1.12 | 3.74 |
| Fe | 238.204 | 2976         | certified   | 167   | 1.46 | 0.874 | 0.98 | 3 | 0.314   | 171    | 4.9  | 0.862  | 0.027   | 0.0055 | 0.0183 | 1.12 | 3.74 |
| Fe | 238.204 | 3233         | certified   | 761   | 20.5 | 2.69  | 0.98 | 3 | 0.364   | 766    | 36   | 3.87   | 0.325   | 0.0055 | 0.0183 | 1.12 | 3.74 |
| Fe | 238.204 | 3233         | certified   | 771   | 21.1 | 2.74  | 0.98 | 3 | 0.275   | 766    | 36   | 4.58   | 0.481   | 0.0055 | 0.0183 | 1.12 | 3.74 |
| Fe | 238.204 | 3290         | certified   | 309   | 8.25 | 2.67  | 0.98 | 3 | -1.21   | 364    | 15   | 1.81   | 0.481   | 0.0055 | 0.0183 | 1.12 | 3.74 |
| Fe | 238.204 | FDA<br>cocoa | certified   | 129   | 1.54 | 1.19  | 0.98 | 3 | 0.00559 | 129.2  | 2.6  | 0.622  | 0.0205  | 0.0055 | 0.0183 | 1.12 | 3.74 |
| Fe | 238.204 | dolt-4       | certified   | 2190  | 68.4 | 3.12  | 0.98 | 3 | 1.97    | 1833   | 75   | 11.8   | 1.19    | 0.0055 | 0.0183 | 1.12 | 3.74 |
| Fe | 238.204 | dorm-4       | certified   | 331   | 5.61 | 1.69  | 0.98 | 3 | 0.213   | 343    | 20   | 1.69   | 0.0431  | 0.0055 | 0.0183 | 1.12 | 3.74 |
| K  | 766.491 | 1566b        | certified   | 5740  | 76.8 | 1.34  | 49   | 3 | -0.978  | 6520   | 90   | 28.2   | 1.35    | 0.517  | 1.72   | 105  | 351  |
| K  | 766.491 | 1566b        | certified   | 5740  | 46.3 | 0.807 | 49   | 3 | -1.01   | 6520   | 90   | 31.6   | 4.44    | 0.517  | 1.72   | 105  | 351  |
| K  | 766.491 | 1568b        | certified   | 915   | 17   | 1.86  | 49   | 3 | -3.21   | 1282   | 11   | 4.84   | 0.202   | 0.517  | 1.72   | 105  | 351  |
| K  | 766.491 | 1577c        | certified   | 9400  | 47.7 | 0.507 | 49   | 3 | -0.427  | 10230  | 640  | 45.3   | 4.08    | 0.517  | 1.72   | 105  | 351  |
| K  | 766.491 | 1577c        | certified   | 9400  | 23   | 0.245 | 49   | 3 | -0.28   | 10230  | 640  | 44.4   | 1.12    | 0.517  | 1.72   | 105  | 351  |
| K  | 766.491 | 1577c        | certified   | 9370  | 93.6 | 0.999 | 49   | 3 | -0.38   | 10230  | 640  | 43.9   | 0.24    | 0.517  | 1.72   | 105  | 351  |
| K  | 766.491 | 1845a        | certified   | 3640  | 50.3 | 1.38  | 49   | 3 | -1.13   | 4110   | 400  | 19.4   | 3.25    | 0.517  | 1.72   | 105  | 351  |
| K  | 766.491 | 2976         | reference   | 9280  | 31.8 | 0.343 | 49   | 3 | 0.0946  | 9700   | 500  | 47.8   | 1.2     | 0.517  | 1.72   | 105  | 351  |
| K  | 766.491 | 3233         | certified   | 2530  | 50.5 | 2     | 49   | 3 | -1.51   | 3060   | 140  | 12.9   | 1.28    | 0.517  | 1.72   | 105  | 351  |
| K  | 766.491 | 3233         | certified   | 2600  | 29.5 | 1.13  | 49   | 3 | -1.45   | 3060   | 140  | 15.4   | 1.42    | 0.517  | 1.72   | 105  | 351  |
| K  | 766.491 | 3290         | certified   | 6560  | 21.6 | 0.329 | 49   | 3 | -1.11   | 7660   | 250  | 38.3   | 8.94    | 0.517  | 1.72   | 105  | 351  |
| K  | 766.491 | FDA<br>cocoa | certified   | 17800 | 114  | 0.64  | 49   | 3 | -0.121  | 17981  | 431  | 85.5   | 3.26    | 0.517  | 1.72   | 105  | 351  |
| K  | 766.491 | dolt-4       | information | 8290  | 62.6 | 0.755 | 49   | 3 | NA      | 9800   | NA   | 44.5   | 3.63    | 0.517  | 1.72   | 105  | 351  |
| K  | 766.491 | dorm-4       | certified   | 11700 | 102  | 0.872 | 49   | 3 | -2.33   | 15500  | 1000 | 59.5   | 1.61    | 0.517  | 1.72   | 105  | 351  |
| Mg | 279.8   | 1566b        | certified   | 1070  | 3.42 | 0.32  | 9.8  | 3 | 0.195   | 1085   | 23   | 5.25   | 0.196   | 0.0514 | 0.171  | 10.5 | 34.9 |
| Mg | 279.8   | 1566b        | certified   | 1050  | 24.9 | 2.37  | 9.8  | 3 | 0.00771 | 1085   | 23   | 5.78   | 0.722   | 0.0514 | 0.171  | 10.5 | 34.9 |
| Mg | 279.8   | 1568b        | certified   | 476   | 17.1 | 3.59  | 9.8  | 3 | -1.07   | 559    | 10   | 2.52   | 0.152   | 0.0514 | 0.171  | 10.5 | 34.9 |
| Mg | 279.8   | 1577c        | certified   | 592   | 3.23 | 0.546 | 9.8  | 3 | -0.057  | 620    | 42   | 2.85   | 0.231   | 0.0514 | 0.171  | 10.5 | 34.9 |

|    |         |           |             |       |       |        |       |      |   |         |       |      |         |          |         |         |       |      |
|----|---------|-----------|-------------|-------|-------|--------|-------|------|---|---------|-------|------|---------|----------|---------|---------|-------|------|
| Mg | 279.8   | 1577c     | certified   |       | 590   | 8.63   | 1.46  | 9.8  | 3 | 0.0495  | 620   | 42   | 2.78    | 0.0623   | 0.0514  | 0.171   | 10.5  | 34.9 |
| Mg | 279.8   | 1577c     | certified   |       | 588   | 3.87   | 0.658 | 9.8  | 3 | -0.0474 | 620   | 42   | 2.75    | 0.00934  | 0.0514  | 0.171   | 10.5  | 34.9 |
| Mg | 279.8   | 1845a     | certified   |       | 399   | 13.3   | 3.33  | 9.8  | 3 | -0.168  | 406   | 12   | 2.12    | 0.322    | 0.0514  | 0.171   | 10.5  | 34.9 |
| Mg | 279.8   | 2976      | reference   |       | 4630  | 51     | 1.1   | 9.8  | 3 | -0.8    | 5300  | 500  | 23.8    | 0.831    | 0.0514  | 0.171   | 10.5  | 34.9 |
| Mg | 279.8   | 3233      | certified   |       | 1040  | 9.98   | 0.96  | 9.8  | 3 | -0.0388 | 1093  | 37   | 5.29    | 0.432    | 0.0514  | 0.171   | 10.5  | 34.9 |
| Mg | 279.8   | 3233      | certified   |       | 1050  | 4.69   | 0.447 | 9.8  | 3 | -0.19   | 1093  | 37   | 6.22    | 0.496    | 0.0514  | 0.171   | 10.5  | 34.9 |
| Mg | 279.8   | 3290      | certified   |       | 921   | 16.8   | 1.82  | 9.8  | 3 | -0.14   | 981   | 84   | 5.37    | 1.17     | 0.0514  | 0.171   | 10.5  | 34.9 |
| Mg | 279.8   | FDA cocoa | certified   |       | 6110  | 94     | 1.54  | 9.8  | 3 | 0.333   | 5908  | 123  | 29.4    | 0.941    | 0.0514  | 0.171   | 10.5  | 34.9 |
| Mg | 279.8   | dolt-4    | information |       | 1340  | 33.7   | 2.51  | 9.8  | 3 | NA      | 1500  | NA   | 7.2     | 0.591    | 0.0514  | 0.171   | 10.5  | 34.9 |
| Mg | 279.8   | dorm-4    | certified   |       | 850   | 28.6   | 3.36  | 9.8  | 3 | -0.0858 | 910   | 80   | 4.33    | 0.22     | 0.0514  | 0.171   | 10.5  | 34.9 |
| Mn | 257.61  | 1566b     | certified   |       | 17.6  | 0.169  | 0.96  | 0.98 | 3 | -0.192  | 18.5  | 0.2  | 0.0862  | 0.00414  | 0.00208 | 0.00694 | 0.425 | 1.42 |
| Mn | 257.61  | 1566b     | certified   |       | 17.5  | 0.24   | 1.37  | 0.98 | 3 | -0.27   | 18.5  | 0.2  | 0.0961  | 0.0129   | 0.00208 | 0.00694 | 0.425 | 1.42 |
| Mn | 257.61  | 1568b     | certified   |       | 18.2  | 0.486  | 2.67  | 0.98 | 3 | 0.018   | 19.2  | 1.8  | 0.096   | 0.00545  | 0.00208 | 0.00694 | 0.425 | 1.42 |
| Mn | 257.61  | 1577c     | certified   |       | 9.56  | 0.0731 | 0.765 | 0.98 | 3 | -0.487  | 10.46 | 0.47 | 0.046   | 0.00376  | 0.00208 | 0.00694 | 0.425 | 1.42 |
| Mn | 257.61  | 1577c     | certified   |       | 9.51  | 0.16   | 1.68  | 0.98 | 3 | -0.396  | 10.46 | 0.47 | 0.0449  | 0.000955 | 0.00208 | 0.00694 | 0.425 | 1.42 |
| Mn | 257.61  | 1577c     | certified   |       | 9.35  | 0.0501 | 0.536 | 0.98 | 3 | -0.641  | 10.46 | 0.47 | 0.0438  | 5.00E-04 | 0.00208 | 0.00694 | 0.425 | 1.42 |
| Mn | 257.61  | 1845a     | certified   | Trace | 0.604 | 0.152  | 25.2  | 0.98 | 3 | -6.69   | 1.15  | 0.11 | 0.00326 | 0.00116  | 0.00208 | 0.00694 | 0.425 | 1.42 |
| Mn | 257.61  | 2976      | reference   |       | 35.4  | 0.592  | 1.67  | 0.98 | 3 | 1.15    | 33    | 2    | 0.182   | 0.00742  | 0.00208 | 0.00694 | 0.425 | 1.42 |
| Mn | 257.61  | 3233      | certified   |       | 30.6  | 0.246  | 0.804 | 0.98 | 3 | -0.339  | 33.1  | 1.1  | 0.156   | 0.0134   | 0.00208 | 0.00694 | 0.425 | 1.42 |
| Mn | 257.61  | 3233      | certified   |       | 30.7  | 0.204  | 0.664 | 0.98 | 3 | -0.527  | 33.1  | 1.1  | 0.182   | 0.0152   | 0.00208 | 0.00694 | 0.425 | 1.42 |
| Mn | 257.61  | 3290      | certified   |       | 69.2  | 1.31   | 1.89  | 0.98 | 3 | -0.178  | 74    | 6.8  | 0.404   | 0.0947   | 0.00208 | 0.00694 | 0.425 | 1.42 |
| Mn | 257.61  | FDA cocoa | certified   |       | 53.1  | 0.231  | 0.435 | 0.98 | 3 | 0.264   | 51.68 | 1.55 | 0.256   | 0.0105   | 0.00208 | 0.00694 | 0.425 | 1.42 |
| Mn | 257.61  | dolt-4    | NA          |       | 8.73  | 0.347  | 3.97  | 0.98 | 3 | NA      | NA    | NA   | 0.0468  | 0.00497  | 0.00208 | 0.00694 | 0.425 | 1.42 |
| Mn | 257.61  | dorm-4    | certified   |       | 2.01  | 0.155  | 7.71  | 0.98 | 3 | -4.16   | 3.17  | 0.26 | 0.0103  | 0.000958 | 0.00208 | 0.00694 | 0.425 | 1.42 |
| Na | 588.995 | 1566b     | certified   |       | 3440  | 44.4   | 1.29  | 49   | 3 | 0.719   | 3297  | 53   | 16.9    | 0.707    | 0.538   | 1.79    | 110   | 366  |
| Na | 588.995 | 1566b     | certified   |       | 3400  | 96.5   | 2.84  | 49   | 3 | 0.585   | 3297  | 53   | 18.7    | 2.24     | 0.538   | 1.79    | 110   | 366  |
| Na | 588.995 | 1568b     | certified   | Trace | 329   | 20.2   | 6.14  | 49   | 3 | 9.81    | 6.74  | 0.19 | 1.74    | 0.0505   | 0.538   | 1.79    | 110   | 366  |
| Na | 588.995 | 1577c     | certified   |       | 2290  | 37.8   | 1.65  | 49   | 3 | 1.46    | 2033  | 64   | 11      | 0.795    | 0.538   | 1.79    | 110   | 366  |
| Na | 588.995 | 1577c     | certified   |       | 2310  | 20.4   | 0.883 | 49   | 3 | 1.68    | 2033  | 64   | 10.9    | 0.232    | 0.538   | 1.79    | 110   | 366  |
| Na | 588.995 | 1577c     | certified   |       | 2270  | 11.6   | 0.511 | 49   | 3 | 1.44    | 2033  | 64   | 10.6    | 0.036    | 0.538   | 1.79    | 110   | 366  |
| Na | 588.995 | 1845a     | certified   |       | 4810  | 108    | 2.25  | 49   | 3 | 0.492   | 4576  | 93   | 25.6    | 3.79     | 0.538   | 1.79    | 110   | 366  |
| Na | 588.995 | 2976      | reference   |       | 34000 | 246    | 0.724 | 49   | 3 | 0.246   | 35000 | 1000 | 175     | 3.06     | 0.538   | 1.79    | 110   | 366  |

|    |         |              |             |       |       |      |       |     |   |        |       |      |      |        |        |        |      |      |
|----|---------|--------------|-------------|-------|-------|------|-------|-----|---|--------|-------|------|------|--------|--------|--------|------|------|
| Na | 588.995 | 3233         | certified   |       | 6800  | 75.2 | 1.11  | 49  | 3 | 0.387  | 6830  | 120  | 34.5 | 2.81   | 0.538  | 1.79   | 110  | 366  |
| Na | 588.995 | 3233         | certified   |       | 6750  | 20.7 | 0.307 | 49  | 3 | 0.101  | 6830  | 120  | 40   | 3.31   | 0.538  | 1.79   | 110  | 366  |
| Na | 588.995 | 3290         | certified   |       | 5030  | 120  | 2.39  | 49  | 3 | -0.405 | 5500  | 230  | 29.3 | 6.22   | 0.538  | 1.79   | 110  | 366  |
| Na | 588.995 | FDA<br>cocoa | certified   | Trace | 337   | 20   | 5.93  | 49  | 3 | 9.4    | 19.89 | 2.02 | 1.62 | 0.0396 | 0.538  | 1.79   | 110  | 366  |
| Na | 588.995 | dolt-4       | information |       | 6690  | 32.1 | 0.48  | 49  | 3 | NA     | 6800  | NA   | 35.8 | 2.49   | 0.538  | 1.79   | 110  | 366  |
| Na | 588.995 | dorm-4       | reference   |       | 13700 | 178  | 1.3   | 49  | 3 | NA     | 14000 | 2400 | 69.9 | 2.13   | 0.538  | 1.79   | 110  | 366  |
| P  | 213.618 | 1566b        | NA          |       | 6740  | 117  | 1.74  | 9.8 | 3 | NA     | NA    | NA   | 33.1 | 1.27   | 0.0287 | 0.0957 | 5.86 | 19.5 |
| P  | 213.618 | 1566b        | NA          |       | 6610  | 74.9 | 1.13  | 9.8 | 3 | NA     | NA    | NA   | 36.4 | 4.98   | 0.0287 | 0.0957 | 5.86 | 19.5 |
| P  | 213.618 | 1568b        | certified   |       | 1380  | 30.6 | 2.22  | 9.8 | 3 | -0.464 | 1530  | 40   | 7.29 | 0.375  | 0.0287 | 0.0957 | 5.86 | 19.5 |
| P  | 213.618 | 1577c        | reference   |       | 9620  | 142  | 1.48  | 9.8 | 3 | NA     | 11750 | 270  | 46.3 | 3.48   | 0.0287 | 0.0957 | 5.86 | 19.5 |
| P  | 213.618 | 1577c        | reference   |       | 9790  | 359  | 3.67  | 9.8 | 3 | NA     | 11750 | 270  | 46.2 | 0.833  | 0.0287 | 0.0957 | 5.86 | 19.5 |
| P  | 213.618 | 1577c        | reference   |       | 9650  | 133  | 1.38  | 9.8 | 3 | NA     | 11750 | 270  | 45.2 | 0.475  | 0.0287 | 0.0957 | 5.86 | 19.5 |
| P  | 213.618 | 1845a        | certified   |       | 7770  | 199  | 2.56  | 9.8 | 3 | -1.04  | 8640  | 610  | 41.3 | 5.9    | 0.0287 | 0.0957 | 5.86 | 19.5 |
| P  | 213.618 | 2976         | NA          |       | 6990  | 80   | 1.14  | 9.8 | 3 | NA     | NA    | NA   | 36   | 1.24   | 0.0287 | 0.0957 | 5.86 | 19.5 |
| P  | 213.618 | 3233         | certified   |       | 2430  | 31   | 1.28  | 9.8 | 3 | -0.208 | 2592  | 68   | 12.3 | 1      | 0.0287 | 0.0957 | 5.86 | 19.5 |
| P  | 213.618 | 3233         | certified   |       | 2440  | 24.6 | 1.01  | 9.8 | 3 | -0.379 | 2592  | 68   | 14.5 | 1.35   | 0.0287 | 0.0957 | 5.86 | 19.5 |
| P  | 213.618 | 3290         | certified   |       | 8240  | 595  | 7.22  | 9.8 | 3 | -0.744 | 9320  | 510  | 47.7 | 7.58   | 0.0287 | 0.0957 | 5.86 | 19.5 |
| P  | 213.618 | FDA<br>cocoa | certified   |       | 7950  | 213  | 2.68  | 9.8 | 3 | -0.425 | 8300  | 392  | 38.3 | 0.717  | 0.0287 | 0.0957 | 5.86 | 19.5 |
| P  | 213.618 | dolt-4       | NA          |       | 9950  | 98.6 | 0.991 | 9.8 | 3 | NA     | NA    | NA   | 53.4 | 4.34   | 0.0287 | 0.0957 | 5.86 | 19.5 |
| P  | 213.618 | dorm-4       | information |       | 7080  | 97   | 1.37  | 9.8 | 3 | NA     | 8000  | NA   | 36.1 | 1.16   | 0.0287 | 0.0957 | 5.86 | 19.5 |
| S  | 181.972 | 1566b        | certified   |       | 6150  | 32   | 0.52  | 9.8 | 3 | -0.833 | 6890  | 140  | 30.2 | 1.3    | 0.0665 | 0.222  | 13.6 | 45.2 |
| S  | 181.972 | 1566b        | certified   |       | 6030  | 141  | 2.34  | 9.8 | 3 | -1.08  | 6890  | 140  | 33.2 | 4.33   | 0.0665 | 0.222  | 13.6 | 45.2 |
| S  | 181.972 | 1568b        | certified   |       | 994   | 24.8 | 2.49  | 9.8 | 3 | -1.39  | 1200  | 10   | 5.26 | 0.305  | 0.0665 | 0.222  | 13.6 | 45.2 |
| S  | 181.972 | 1577c        | certified   |       | 6720  | 94   | 1.4   | 9.8 | 3 | -0.686 | 7490  | 340  | 32.4 | 3.06   | 0.0665 | 0.222  | 13.6 | 45.2 |
| S  | 181.972 | 1577c        | certified   |       | 6840  | 86.1 | 1.26  | 9.8 | 3 | -0.349 | 7490  | 340  | 32.3 | 0.489  | 0.0665 | 0.222  | 13.6 | 45.2 |
| S  | 181.972 | 1577c        | certified   |       | 6770  | 55.8 | 0.824 | 9.8 | 3 | -0.518 | 7490  | 340  | 31.7 | 0.26   | 0.0665 | 0.222  | 13.6 | 45.2 |
| S  | 181.972 | 1845a        | NA          |       | 5420  | 119  | 2.2   | 9.8 | 3 | NA     | NA    | NA   | 28.8 | 4.8    | 0.0665 | 0.222  | 13.6 | 45.2 |
| S  | 181.972 | 2976         | NA          |       | 16100 | 102  | 0.634 | 9.8 | 3 | NA     | NA    | NA   | 83.1 | 2.48   | 0.0665 | 0.222  | 13.6 | 45.2 |
| S  | 181.972 | 3233         | NA          |       | 873   | 12.8 | 1.47  | 9.8 | 3 | NA     | NA    | NA   | 4.43 | 0.322  | 0.0665 | 0.222  | 13.6 | 45.2 |
| S  | 181.972 | 3233         | NA          |       | 875   | 4.51 | 0.515 | 9.8 | 3 | NA     | NA    | NA   | 5.19 | 0.429  | 0.0665 | 0.222  | 13.6 | 45.2 |
| S  | 181.972 | 3290         | NA          |       | 4840  | 206  | 4.26  | 9.8 | 3 | NA     | NA    | NA   | 28.1 | 5.36   | 0.0665 | 0.222  | 13.6 | 45.2 |
| S  | 181.972 | FDA<br>cocoa | NA          |       | 2870  | 12.6 | 0.439 | 9.8 | 3 | NA     | NA    | NA   | 13.8 | 0.588  | 0.0665 | 0.222  | 13.6 | 45.2 |

|    |         |              |           |       |       |       |      |   |         |       |      |       |         |         |         |       |      |
|----|---------|--------------|-----------|-------|-------|-------|------|---|---------|-------|------|-------|---------|---------|---------|-------|------|
| S  | 181.972 | dolt-4       | NA        | 12600 | 124   | 0.984 | 9.8  | 3 | NA      | NA    | NA   | 67.5  | 5.69    | 0.0665  | 0.222   | 13.6  | 45.2 |
| S  | 181.972 | dorm-4       | NA        | 8280  | 90.1  | 1.09  | 9.8  | 3 | NA      | NA    | NA   | 42.2  | 0.592   | 0.0665  | 0.222   | 13.6  | 45.2 |
| Zn | 202.548 | 1566b        | certified | 2220  | 61.9  | 2.79  | 0.98 | 3 | 3.78    | 1424  | 46   | 10.9  | 0.694   | 0.00193 | 0.00642 | 0.393 | 1.31 |
| Zn | 202.548 | 1566b        | certified | 2240  | 163   | 7.28  | 0.98 | 3 | 3.8     | 1424  | 46   | 12.4  | 2.74    | 0.00193 | 0.00642 | 0.393 | 1.31 |
| Zn | 202.548 | 1568b        | certified | 17    | 0.444 | 2.61  | 0.98 | 3 | -0.765  | 19.42 | 0.26 | 0.09  | 0.00501 | 0.00193 | 0.00642 | 0.393 | 1.31 |
| Zn | 202.548 | 1577c        | certified | 188   | 0.586 | 0.312 | 0.98 | 3 | 0.747   | 181.1 | 1    | 0.905 | 0.0766  | 0.00193 | 0.00642 | 0.393 | 1.31 |
| Zn | 202.548 | 1577c        | certified | 188   | 2.68  | 1.43  | 0.98 | 3 | 0.884   | 181.1 | 1    | 0.887 | 0.0188  | 0.00193 | 0.00642 | 0.393 | 1.31 |
| Zn | 202.548 | 1577c        | certified | 187   | 0.634 | 0.339 | 0.98 | 3 | 0.76    | 181.1 | 1    | 0.875 | 0.00407 | 0.00193 | 0.00642 | 0.393 | 1.31 |
| Zn | 202.548 | 1845a        | certified | 55.5  | 0.799 | 1.44  | 0.98 | 3 | -0.0794 | 55.9  | 2.3  | 0.295 | 0.0475  | 0.00193 | 0.00642 | 0.393 | 1.31 |
| Zn | 202.548 | 2976         | certified | 138   | 1.58  | 1.14  | 0.98 | 3 | 0.608   | 137   | 13   | 0.713 | 0.0241  | 0.00193 | 0.00642 | 0.393 | 1.31 |
| Zn | 202.548 | 3233         | certified | 607   | 2.06  | 0.339 | 0.98 | 3 | 0.102   | 628   | 16   | 3.08  | 0.263   | 0.00193 | 0.00642 | 0.393 | 1.31 |
| Zn | 202.548 | 3233         | certified | 618   | 10.6  | 1.72  | 0.98 | 3 | 0.0662  | 628   | 16   | 3.67  | 0.349   | 0.00193 | 0.00642 | 0.393 | 1.31 |
| Zn | 202.548 | 3290         | reference | 214   | 17.5  | 8.18  | 0.98 | 3 | -0.04   | 226   | 33   | 1.24  | 0.201   | 0.00193 | 0.00642 | 0.393 | 1.31 |
| Zn | 202.548 | FDA<br>cocoa | certified | 79.7  | 0.405 | 0.508 | 0.98 | 3 | 0.178   | 78.3  | 3.2  | 0.384 | 0.017   | 0.00193 | 0.00642 | 0.393 | 1.31 |
| Zn | 202.548 | dolt-4       | certified | 118   | 0.927 | 0.786 | 0.98 | 3 | 0.578   | 116   | 6    | 0.633 | 0.0502  | 0.00193 | 0.00642 | 0.393 | 1.31 |
| Zn | 202.548 | dorm-4       | certified | 49.4  | 0.814 | 1.65  | 0.98 | 3 | 0.134   | 51.6  | 2.8  | 0.251 | 0.00876 | 0.00193 | 0.00642 | 0.393 | 1.31 |

Table S2.

| Element | Wavelength (nm) | Sample           | Fortified Analytical Portion (FAP) Level | Figure of Merit Indicator | Recovery Mean (%) | Recovery Stdev. (%) | RSD (%) | Standard Concentration (mg/kg) | n | Native Conc. Mean (mg/kg) | Native Conc. Stdev. (mg/kg) | Soln. Conc. Mean (mg/kg) | Soln. Conc. Stdev. (mg/kg) | Spike Conc. (mg/kg) | Analytical Solution Detection Limit (ASDL) | Analytical Solution Quantitation Limit (ASQL) | Limit of Detection (LOD) | Limit of Quantitation (LOQ) |
|---------|-----------------|------------------|------------------------------------------|---------------------------|-------------------|---------------------|---------|--------------------------------|---|---------------------------|-----------------------------|--------------------------|----------------------------|---------------------|--------------------------------------------|-----------------------------------------------|--------------------------|-----------------------------|
| Ca      | 315.887         | Breaded Chicken  | Level 1                                  |                           | 99.6              | 17                  | 17.1    | 9.8                            | 3 | 96.7                      | 0.618                       | 0.918                    | 0.17                       | 71.3                | 0.0286                                     | 0.0953                                        | 5.83                     | 19.4                        |
| Ca      | 315.887         | Breaded Chicken  | Level 2                                  |                           | 98.8              | 8.07                | 8.17    | 9.8                            | 3 | 96.7                      | 0.618                       | 1.16                     | 0.0445                     | 134                 | 0.0286                                     | 0.0953                                        | 5.83                     | 19.4                        |
| Ca      | 315.887         | Breaded Chicken  | Level 3                                  |                           | 96.9              | 7.48                | 7.72    | 9.8                            | 3 | 96.7                      | 0.618                       | 2.24                     | 0.104                      | 336                 | 0.0286                                     | 0.0953                                        | 5.83                     | 19.4                        |
| Ca      | 315.887         | Corn Flakes      | Level 1                                  |                           | 53.5              | 14.3                | 26.7    | 9.8                            | 3 | 20.6                      | 11.8                        | 0.135                    | 0.0133                     | 12.8                | 0.0286                                     | 0.0953                                        | 5.83                     | 19.4                        |
| Ca      | 315.887         | Corn Flakes      | Level 2                                  |                           | 74.6              | 4.22                | 5.66    | 9.8                            | 3 | 20.6                      | 11.8                        | 0.209                    | 0.015                      | 25.7                | 0.0286                                     | 0.0953                                        | 5.83                     | 19.4                        |
| Ca      | 315.887         | Corn Flakes      | Level 3                                  |                           | 87.6              | 0.817               | 0.933   | 9.8                            | 3 | 20.6                      | 11.8                        | 0.384                    | 0.00768                    | 63.6                | 0.0286                                     | 0.0953                                        | 5.83                     | 19.4                        |
| Ca      | 315.887         | Italian Dressing | Level 1                                  |                           | 98.1              | 3.48                | 3.55    | 9.8                            | 3 | 98.3                      | 1.21                        | 0.744                    | 0.0147                     | 53.3                | 0.0286                                     | 0.0953                                        | 5.83                     | 19.4                        |
| Ca      | 315.887         | Italian Dressing | Level 2                                  |                           | 107               | 9.44                | 8.82    | 9.8                            | 3 | 98.3                      | 1.21                        | 1.1                      | 0.1                        | 117                 | 0.0286                                     | 0.0953                                        | 5.83                     | 19.4                        |
| Ca      | 315.887         | Italian Dressing | Level 3                                  |                           | 94.2              | 0.962               | 1.02    | 9.8                            | 3 | 98.3                      | 1.21                        | 1.84                     | 0.0365                     | 273                 | 0.0286                                     | 0.0953                                        | 5.83                     | 19.4                        |
| Ca      | 315.887         | Vegetable Oil    | Level 1                                  | < LOD                     | -137              | 21.5                | -15.7   | 9.8                            | 3 | -15.4                     | 1.22                        | -0.0234                  | 0.0023                     | 6.69                | 0.0286                                     | 0.0953                                        | 5.83                     | 19.4                        |
| Ca      | 315.887         | Vegetable Oil    | Level 2                                  | < LOD                     | -16.5             | 19.5                | -118    | 9.8                            | 3 | -15.4                     | 1.22                        | -0.00603                 | 0.00715                    | 14.1                | 0.0286                                     | 0.0953                                        | 5.83                     | 19.4                        |
| Ca      | 315.887         | Vegetable Oil    | Level 3                                  | Trace                     | 57                | 9.09                | 15.9    | 9.8                            | 3 | -15.4                     | 1.22                        | 0.0568                   | 0.00947                    | 40.2                | 0.0286                                     | 0.0953                                        | 5.83                     | 19.4                        |
| Cu      | 327.395         | Breaded Chicken  | Level 1                                  | < LOD                     | 80.9              | 55.8                | 69      | 0.98                           | 3 | -0.0152                   | 0.0546                      | 0.00188                  | 0.00138                    | 0.377               | 0.00343                                    | 0.0114                                        | 0.699                    | 2.33                        |
| Cu      | 327.395         | Breaded Chicken  | Level 2                                  | < LOD                     | 91                | 7.43                | 8.16    | 0.98                           | 3 | -0.0152                   | 0.0546                      | 0.00328                  | 0.000238                   | 0.711               | 0.00343                                    | 0.0114                                        | 0.699                    | 2.33                        |
| Cu      | 327.395         | Breaded Chicken  | Level 3                                  | Trace                     | 99.9              | 8.57                | 8.58    | 0.98                           | 3 | -0.0152                   | 0.0546                      | 0.0094                   | 0.000338                   | 1.78                | 0.00343                                    | 0.0114                                        | 0.699                    | 2.33                        |
| Cu      | 327.395         | Corn Flakes      | Level 1                                  | Trace                     | 86.3              | 7.08                | 8.2     | 0.98                           | 3 | -0.235                    | 0.0868                      | 0.00882                  | 0.00103                    | 2.06                | 0.00343                                    | 0.0114                                        | 0.699                    | 2.33                        |
| Cu      | 327.395         | Corn Flakes      | Level 2                                  |                           | 91.6              | 2.07                | 2.26    | 0.98                           | 3 | -0.235                    | 0.0868                      | 0.02                     | 0.00133                    | 4.16                | 0.00343                                    | 0.0114                                        | 0.699                    | 2.33                        |
| Cu      | 327.395         | Corn Flakes      | Level 3                                  |                           | 97.5              | 1.32                | 1.35    | 0.98                           | 3 | -0.235                    | 0.0868                      | 0.0505                   | 0.00136                    | 10.3                | 0.00343                                    | 0.0114                                        | 0.699                    | 2.33                        |
| Cu      | 327.395         | Italian Dressing | Level 1                                  | Trace                     | 78.6              | 6.98                | 8.88    | 0.98                           | 3 | -0.412                    | 0.126                       | 0.00565                  | 0.000449                   | 1.46                | 0.00343                                    | 0.0114                                        | 0.699                    | 2.33                        |
| Cu      | 327.395         | Italian Dressing | Level 2                                  |                           | 81.7              | 4.9                 | 6       | 0.98                           | 3 | -0.412                    | 0.126                       | 0.0128                   | 0.000288                   | 3.21                | 0.00343                                    | 0.0114                                        | 0.699                    | 2.33                        |
| Cu      | 327.395         | Italian Dressing | Level 3                                  |                           | 93.9              | 2.69                | 2.86    | 0.98                           | 3 | -0.412                    | 0.126                       | 0.0362                   | 0.00121                    | 7.48                | 0.00343                                    | 0.0114                                        | 0.699                    | 2.33                        |
| Cu      | 327.395         | Vegetable Oil    | Level 1                                  | < LOD                     | 35.7              | 5.33                | 14.9    | 0.98                           | 3 | -0.962                    | 0.151                       | 0.00183                  | 0.000339                   | 1.98                | 0.00343                                    | 0.0114                                        | 0.699                    | 2.33                        |
| Cu      | 327.395         | Vegetable Oil    | Level 2                                  | Trace                     | 78.5              | 5.73                | 7.3     | 0.98                           | 3 | -0.962                    | 0.151                       | 0.00848                  | 0.000685                   | 4.16                | 0.00343                                    | 0.0114                                        | 0.699                    | 2.33                        |
| Cu      | 327.395         | Vegetable Oil    | Level 3                                  |                           | 94.1              | 3.3                 | 3.51    | 0.98                           | 3 | -0.962                    | 0.151                       | 0.0278                   | 0.0014                     | 11.9                | 0.00343                                    | 0.0114                                        | 0.699                    | 2.33                        |
| Fe      | 238.204         | Breaded Chicken  | Level 1                                  |                           | 85.7              | 24.4                | 28.5    | 0.98                           | 3 | 10.2                      | 0.238                       | 0.0781                   | 0.0129                     | 4.83                | 0.0055                                     | 0.0183                                        | 1.12                     | 3.74                        |
| Fe      | 238.204         | Breaded Chicken  | Level 2                                  |                           | 95.2              | 9.91                | 10.4    | 0.98                           | 3 | 10.2                      | 0.238                       | 0.0955                   | 0.00407                    | 9.1                 | 0.0055                                     | 0.0183                                        | 1.12                     | 3.74                        |
| Fe      | 238.204         | Breaded Chicken  | Level 3                                  |                           | 94                | 6.28                | 6.68    | 0.98                           | 3 | 10.2                      | 0.238                       | 0.167                    | 0.00746                    | 22.8                | 0.0055                                     | 0.0183                                        | 1.12                     | 3.74                        |
| Fe      | 238.204         | Corn Flakes      | Level 1                                  |                           | 107               | 3.73                | 3.49    | 0.98                           | 3 | 370                       | 7.36                        | 2.8                      | 0.136                      | 185                 | 0.0055                                     | 0.0183                                        | 1.12                     | 3.74                        |

|    |         |                  |         |       |      |       |       |      |   |        |       |         |          |      |        |        |      |      |
|----|---------|------------------|---------|-------|------|-------|-------|------|---|--------|-------|---------|----------|------|--------|--------|------|------|
| Fe | 238.204 | Corn Flakes      | Level 2 |       | 104  | 2.33  | 2.24  | 0.98 | 3 | 370    | 7.36  | 3.98    | 0.246    | 372  | 0.0055 | 0.0183 | 1.12 | 3.74 |
| Fe | 238.204 | Corn Flakes      | Level 3 |       | 108  | 4.55  | 4.21  | 0.98 | 3 | 370    | 7.36  | 6.88    | 0.307    | 922  | 0.0055 | 0.0183 | 1.12 | 3.74 |
| Fe | 238.204 | Italian Dressing | Level 1 | Trace | 113  | 20.8  | 18.4  | 0.98 | 3 | 2.12   | 0.125 | 0.0166  | 0.00116  | 1.11 | 0.0055 | 0.0183 | 1.12 | 3.74 |
| Fe | 238.204 | Italian Dressing | Level 2 |       | 90.9 | 5.89  | 6.48  | 0.98 | 3 | 2.12   | 0.125 | 0.0212  | 0.000276 | 2.44 | 0.0055 | 0.0183 | 1.12 | 3.74 |
| Fe | 238.204 | Italian Dressing | Level 3 |       | 104  | 20.8  | 20    | 0.98 | 3 | 2.12   | 0.125 | 0.0416  | 0.00671  | 5.68 | 0.0055 | 0.0183 | 1.12 | 3.74 |
| Fe | 238.204 | Vegetable Oil    | Level 1 | < LOD | 136  | 16.8  | 12.4  | 0.98 | 3 | 0.357  | 0.092 | 0.00487 | 0.000578 | 1.39 | 0.0055 | 0.0183 | 1.12 | 3.74 |
| Fe | 238.204 | Vegetable Oil    | Level 2 | Trace | 110  | 6.65  | 6.05  | 0.98 | 3 | 0.357  | 0.092 | 0.00834 | 0.000525 | 2.92 | 0.0055 | 0.0183 | 1.12 | 3.74 |
| Fe | 238.204 | Vegetable Oil    | Level 3 |       | 109  | 1.73  | 1.59  | 0.98 | 3 | 0.357  | 0.092 | 0.0225  | 0.000622 | 8.36 | 0.0055 | 0.0183 | 1.12 | 3.74 |
| K  | 766.491 | Breaded Chicken  | Level 1 |       | 99.5 | 17.3  | 17.4  | 49   | 3 | 2840   | 45    | 25.5    | 4.51     | 1830 | 0.517  | 1.72   | 105  | 351  |
| K  | 766.491 | Breaded Chicken  | Level 2 |       | 97.8 | 6.61  | 6.76  | 49   | 3 | 2840   | 45    | 31.7    | 1.46     | 3480 | 0.517  | 1.72   | 105  | 351  |
| K  | 766.491 | Breaded Chicken  | Level 3 |       | 97   | 7.49  | 7.72  | 49   | 3 | 2840   | 45    | 59.8    | 2.78     | 8700 | 0.517  | 1.72   | 105  | 351  |
| K  | 766.491 | Corn Flakes      | Level 1 |       | 96   | 7.75  | 8.07  | 49   | 3 | 698    | 24.6  | 5.71    | 0.373    | 478  | 0.517  | 1.72   | 105  | 351  |
| K  | 766.491 | Corn Flakes      | Level 2 |       | 94   | 1.52  | 1.62  | 49   | 3 | 698    | 24.6  | 8.43    | 0.497    | 962  | 0.517  | 1.72   | 105  | 351  |
| K  | 766.491 | Corn Flakes      | Level 3 |       | 96.1 | 1.65  | 1.72  | 49   | 3 | 698    | 24.6  | 15      | 0.417    | 2380 | 0.517  | 1.72   | 105  | 351  |
| K  | 766.491 | Italian Dressing | Level 1 |       | 92   | 5.24  | 5.7   | 49   | 3 | 375    | 11.6  | 3.01    | 0.0882   | 255  | 0.517  | 1.72   | 105  | 351  |
| K  | 766.491 | Italian Dressing | Level 2 |       | 84.4 | 4.7   | 5.57  | 49   | 3 | 375    | 11.6  | 4.15    | 0.0836   | 560  | 0.517  | 1.72   | 105  | 351  |
| K  | 766.491 | Italian Dressing | Level 3 |       | 92.4 | 1.94  | 2.1   | 49   | 3 | 375    | 11.6  | 8.17    | 0.116    | 1310 | 0.517  | 1.72   | 105  | 351  |
| K  | 766.491 | Vegetable Oil    | Level 1 | Trace | 58.2 | 6.13  | 10.5  | 49   | 3 | -130   | 24.5  | 0.856   | 0.162    | 566  | 0.517  | 1.72   | 105  | 351  |
| K  | 766.491 | Vegetable Oil    | Level 2 |       | 73.9 | 2.85  | 3.86  | 49   | 3 | -130   | 24.5  | 2.27    | 0.0876   | 1180 | 0.517  | 1.72   | 105  | 351  |
| K  | 766.491 | Vegetable Oil    | Level 3 |       | 83.6 | 2.74  | 3.28  | 49   | 3 | -130   | 24.5  | 7.04    | 0.354    | 3400 | 0.517  | 1.72   | 105  | 351  |
| Mg | 279.8   | Breaded Chicken  | Level 1 |       | 102  | 19.6  | 19.2  | 9.8  | 3 | 255    | 5.49  | 2.27    | 0.382    | 158  | 0.0514 | 0.171  | 10.5 | 34.9 |
| Mg | 279.8   | Breaded Chicken  | Level 2 |       | 103  | 7.77  | 7.54  | 9.8  | 3 | 255    | 5.49  | 2.85    | 0.118    | 298  | 0.0514 | 0.171  | 10.5 | 34.9 |
| Mg | 279.8   | Breaded Chicken  | Level 3 |       | 101  | 7.19  | 7.12  | 9.8  | 3 | 255    | 5.49  | 5.34    | 0.24     | 746  | 0.0514 | 0.171  | 10.5 | 34.9 |
| Mg | 279.8   | Corn Flakes      | Level 1 |       | 101  | 7     | 6.93  | 9.8  | 3 | 89.6   | 2.42  | 0.694   | 0.041    | 50.2 | 0.0514 | 0.171  | 10.5 | 34.9 |
| Mg | 279.8   | Corn Flakes      | Level 2 |       | 97.7 | 1.18  | 1.21  | 9.8  | 3 | 89.6   | 2.42  | 0.99    | 0.0538   | 101  | 0.0514 | 0.171  | 10.5 | 34.9 |
| Mg | 279.8   | Corn Flakes      | Level 3 |       | 99   | 0.635 | 0.641 | 9.8  | 3 | 89.6   | 2.42  | 1.7     | 0.0279   | 250  | 0.0514 | 0.171  | 10.5 | 34.9 |
| Mg | 279.8   | Italian Dressing | Level 1 |       | 104  | 4.19  | 4.03  | 9.8  | 3 | 32.8   | 1.23  | 0.257   | 0.00564  | 18.5 | 0.0514 | 0.171  | 10.5 | 34.9 |
| Mg | 279.8   | Italian Dressing | Level 2 |       | 97.4 | 5.98  | 6.14  | 9.8  | 3 | 32.8   | 1.23  | 0.354   | 0.00841  | 40.7 | 0.0514 | 0.171  | 10.5 | 34.9 |
| Mg | 279.8   | Italian Dressing | Level 3 |       | 110  | 12.4  | 11.3  | 9.8  | 3 | 32.8   | 1.23  | 0.709   | 0.0709   | 94.9 | 0.0514 | 0.171  | 10.5 | 34.9 |
| Mg | 279.8   | Vegetable Oil    | Level 1 | Trace | 107  | 4.42  | 4.13  | 9.8  | 3 | 0.0928 | 3.05  | 0.0831  | 0.00944  | 30.1 | 0.0514 | 0.171  | 10.5 | 34.9 |
| Mg | 279.8   | Vegetable Oil    | Level 2 | Trace | 104  | 7.6   | 7.31  | 9.8  | 3 | 0.0928 | 3.05  | 0.17    | 0.0115   | 63.3 | 0.0514 | 0.171  | 10.5 | 34.9 |
| Mg | 279.8   | Vegetable Oil    | Level 3 |       | 103  | 4.57  | 4.44  | 9.8  | 3 | 0.0928 | 3.05  | 0.462   | 0.0222   | 181  | 0.0514 | 0.171  | 10.5 | 34.9 |

|    |         |                  |         |       |       |       |       |      |   |        |        |          |          |       |         |         |       |      |
|----|---------|------------------|---------|-------|-------|-------|-------|------|---|--------|--------|----------|----------|-------|---------|---------|-------|------|
| Mn | 257.61  | Breaded Chicken  | Level 1 |       | 99.1  | 14.2  | 14.3  | 0.98 | 3 | 2.55   | 0.0467 | 0.0254   | 0.00517  | 2.1   | 0.00208 | 0.00694 | 0.425 | 1.42 |
| Mn | 257.61  | Breaded Chicken  | Level 2 |       | 98.7  | 8.74  | 8.86  | 0.98 | 3 | 2.55   | 0.0467 | 0.0328   | 0.00113  | 3.96  | 0.00208 | 0.00694 | 0.425 | 1.42 |
| Mn | 257.61  | Breaded Chicken  | Level 3 |       | 97    | 8.23  | 8.48  | 0.98 | 3 | 2.55   | 0.0467 | 0.0644   | 0.00311  | 9.91  | 0.00208 | 0.00694 | 0.425 | 1.42 |
| Mn | 257.61  | Corn Flakes      | Level 1 | < LOD | 49.2  | 25    | 50.8  | 0.98 | 3 | -0.115 | 0.0812 | 0.000696 | 0.000359 | 0.284 | 0.00208 | 0.00694 | 0.425 | 1.42 |
| Mn | 257.61  | Corn Flakes      | Level 2 | < LOD | 60.4  | 7.48  | 12.4  | 0.98 | 3 | -0.115 | 0.0812 | 0.00183  | 0.000319 | 0.573 | 0.00208 | 0.00694 | 0.425 | 1.42 |
| Mn | 257.61  | Corn Flakes      | Level 3 | Trace | 80.1  | 0.683 | 0.853 | 0.98 | 3 | -0.115 | 0.0812 | 0.00572  | 0.000116 | 1.42  | 0.00208 | 0.00694 | 0.425 | 1.42 |
| Mn | 257.61  | Italian Dressing | Level 1 | < LOD | -72.8 | 28.2  | -38.7 | 0.98 | 3 | -0.278 | 0.0855 | 0.000687 | 0.000246 | 0.193 | 0.00208 | 0.00694 | 0.425 | 1.42 |
| Mn | 257.61  | Italian Dressing | Level 2 | < LOD | 3.4   | 13.4  | 394   | 0.98 | 3 | -0.278 | 0.0855 | 8.32E-05 | 0.000272 | 0.423 | 0.00208 | 0.00694 | 0.425 | 1.42 |
| Mn | 257.61  | Italian Dressing | Level 3 | Trace | 66.3  | 6.95  | 10.5  | 0.98 | 3 | -0.278 | 0.0855 | 0.00338  | 0.000405 | 0.987 | 0.00208 | 0.00694 | 0.425 | 1.42 |
| Mn | 257.61  | Vegetable Oil    | Level 1 | < LOD | -21.3 | 31.6  | -148  | 0.98 | 3 | -0.683 | 0.041  | 0.000354 | 0.000555 | 0.677 | 0.00208 | 0.00694 | 0.425 | 1.42 |
| Mn | 257.61  | Vegetable Oil    | Level 2 | < LOD | 49.1  | 8.77  | 17.9  | 0.98 | 3 | -0.683 | 0.041  | 0.00181  | 0.000336 | 1.42  | 0.00208 | 0.00694 | 0.425 | 1.42 |
| Mn | 257.61  | Vegetable Oil    | Level 3 |       | 80.5  | 5.44  | 6.76  | 0.98 | 3 | -0.683 | 0.041  | 0.00812  | 0.000594 | 4.07  | 0.00208 | 0.00694 | 0.425 | 1.42 |
| Na | 588.995 | Breaded Chicken  | Level 1 |       | 87.8  | 18.8  | 21.4  | 49   | 3 | 7040   | 158    | 56.5     | 9.4      | 3750  | 0.538   | 1.79    | 110   | 366  |
| Na | 588.995 | Breaded Chicken  | Level 2 |       | 88.9  | 7.05  | 7.93  | 49   | 3 | 7040   | 158    | 68       | 2.79     | 7140  | 0.538   | 1.79    | 110   | 366  |
| Na | 588.995 | Breaded Chicken  | Level 3 |       | 98.3  | 13.6  | 13.8  | 49   | 3 | 7040   | 158    | 130      | 5.33     | 17800 | 0.538   | 1.79    | 110   | 366  |
| Na | 588.995 | Corn Flakes      | Level 1 |       | 87.7  | 4.47  | 5.1   | 49   | 3 | 7310   | 83.3   | 50.4     | 2.41     | 3300  | 0.538   | 1.79    | 110   | 366  |
| Na | 588.995 | Corn Flakes      | Level 2 |       | 88    | 1.54  | 1.75  | 49   | 3 | 7310   | 83.3   | 69.3     | 3.44     | 6680  | 0.538   | 1.79    | 110   | 366  |
| Na | 588.995 | Corn Flakes      | Level 3 |       | 92    | 3.18  | 3.46  | 49   | 3 | 7310   | 83.3   | 113      | 4.01     | 16500 | 0.538   | 1.79    | 110   | 366  |
| Na | 588.995 | Italian Dressing | Level 1 |       | 103   | 5.17  | 5.02  | 49   | 3 | 11300  | 91     | 79.7     | 1.64     | 4680  | 0.538   | 1.79    | 110   | 366  |
| Na | 588.995 | Italian Dressing | Level 2 |       | 94.4  | 7.64  | 8.09  | 49   | 3 | 11300  | 91     | 104      | 1.11     | 10600 | 0.538   | 1.79    | 110   | 366  |
| Na | 588.995 | Italian Dressing | Level 3 |       | 99.3  | 3.7   | 3.73  | 49   | 3 | 11300  | 91     | 186      | 0.178    | 24800 | 0.538   | 1.79    | 110   | 366  |
| Na | 588.995 | Vegetable Oil    | Level 1 |       | 78.2  | 36.8  | 47.1  | 49   | 3 | 740    | 21.4   | 2.1      | 0.0614   | 97.9  | 0.538   | 1.79    | 110   | 366  |
| Na | 588.995 | Vegetable Oil    | Level 2 |       | 89.7  | 25.9  | 28.9  | 49   | 3 | 740    | 21.4   | 2.4      | 0.073    | 206   | 0.538   | 1.79    | 110   | 366  |
| Na | 588.995 | Vegetable Oil    | Level 3 |       | 101   | 5.3   | 5.25  | 49   | 3 | 740    | 21.4   | 3.31     | 0.113    | 589   | 0.538   | 1.79    | 110   | 366  |
| P  | 213.618 | Breaded Chicken  | Level 1 |       | 98.9  | 19.2  | 19.4  | 9.8  | 3 | 1540   | 25.6   | 13.3     | 2.17     | 898   | 0.0287  | 0.0957  | 5.86  | 19.5 |
| P  | 213.618 | Breaded Chicken  | Level 2 |       | 97    | 8.67  | 8.94  | 9.8  | 3 | 1540   | 25.6   | 16.2     | 0.578    | 1710  | 0.0287  | 0.0957  | 5.86  | 19.5 |
| P  | 213.618 | Breaded Chicken  | Level 3 |       | 94.9  | 6.71  | 7.07  | 9.8  | 3 | 1540   | 25.6   | 29.7     | 1.57     | 4270  | 0.0287  | 0.0957  | 5.86  | 19.5 |
| P  | 213.618 | Corn Flakes      | Level 1 |       | 99    | 3.66  | 3.7   | 9.8  | 3 | 579    | 4.4    | 4.08     | 0.192    | 249   | 0.0287  | 0.0957  | 5.86  | 19.5 |
| P  | 213.618 | Corn Flakes      | Level 2 |       | 96.2  | 1.12  | 1.16  | 9.8  | 3 | 579    | 4.4    | 5.58     | 0.308    | 502   | 0.0287  | 0.0957  | 5.86  | 19.5 |
| P  | 213.618 | Corn Flakes      | Level 3 |       | 97.9  | 2.34  | 2.39  | 9.8  | 3 | 579    | 4.4    | 9.04     | 0.263    | 1240  | 0.0287  | 0.0957  | 5.86  | 19.5 |
| P  | 213.618 | Italian Dressing | Level 1 |       | 93.1  | 14.3  | 15.4  | 9.8  | 3 | 98.6   | 1.61   | 0.741    | 0.0424   | 55.4  | 0.0287  | 0.0957  | 5.86  | 19.5 |
| P  | 213.618 | Italian Dressing | Level 2 |       | 84.9  | 5.28  | 6.22  | 9.8  | 3 | 98.6   | 1.61   | 0.988    | 0.0148   | 122   | 0.0287  | 0.0957  | 5.86  | 19.5 |

|    |         |                  |         |       |       |      |       |      |   |        |        |         |          |       |         |         |       |      |
|----|---------|------------------|---------|-------|-------|------|-------|------|---|--------|--------|---------|----------|-------|---------|---------|-------|------|
| P  | 213.618 | Italian Dressing | Level 3 |       | 93.8  | 9.34 | 9.96  | 9.8  | 3 | 98.6   | 1.61   | 1.88    | 0.158    | 284   | 0.0287  | 0.0957  | 5.86  | 19.5 |
| P  | 213.618 | Vegetable Oil    | Level 1 | < LOD | -44.1 | 8.72 | -19.8 | 9.8  | 3 | -27.1  | 2.35   | -0.023  | 0.00339  | 20.4  | 0.0287  | 0.0957  | 5.86  | 19.5 |
| P  | 213.618 | Vegetable Oil    | Level 2 | < LOD | 24.2  | 9.37 | 38.7  | 9.8  | 3 | -27.1  | 2.35   | 0.0268  | 0.0104   | 42.8  | 0.0287  | 0.0957  | 5.86  | 19.5 |
| P  | 213.618 | Vegetable Oil    | Level 3 |       | 70.5  | 4.59 | 6.51  | 9.8  | 3 | -27.1  | 2.35   | 0.214   | 0.0169   | 123   | 0.0287  | 0.0957  | 5.86  | 19.5 |
| S  | 181.972 | Breaded Chicken  | Level 1 |       | 97.2  | 21.8 | 22.4  | 9.8  | 3 | 1490   | 15.1   | 13      | 1.97     | 922   | 0.0665  | 0.222   | 13.6  | 45.2 |
| S  | 181.972 | Breaded Chicken  | Level 2 |       | 97    | 6.69 | 6.9   | 9.8  | 3 | 1490   | 15.1   | 16.2    | 0.735    | 1750  | 0.0665  | 0.222   | 13.6  | 45.2 |
| S  | 181.972 | Breaded Chicken  | Level 3 |       | 92.3  | 5.96 | 6.46  | 9.8  | 3 | 1490   | 15.1   | 29.3    | 1.33     | 4380  | 0.0665  | 0.222   | 13.6  | 45.2 |
| S  | 181.972 | Corn Flakes      | Level 1 |       | 95.6  | 7.13 | 7.46  | 9.8  | 3 | 656    | 9.83   | 4.76    | 0.263    | 321   | 0.0665  | 0.222   | 13.6  | 45.2 |
| S  | 181.972 | Corn Flakes      | Level 2 |       | 92.6  | 1.13 | 1.22  | 9.8  | 3 | 656    | 9.83   | 6.6     | 0.36     | 647   | 0.0665  | 0.222   | 13.6  | 45.2 |
| S  | 181.972 | Corn Flakes      | Level 3 |       | 94.3  | 1.07 | 1.13  | 9.8  | 3 | 656    | 9.83   | 10.9    | 0.249    | 1600  | 0.0665  | 0.222   | 13.6  | 45.2 |
| S  | 181.972 | Italian Dressing | Level 1 |       | 107   | 14.1 | 13.2  | 9.8  | 3 | 182    | 2.57   | 1.39    | 0.0711   | 93.3  | 0.0665  | 0.222   | 13.6  | 45.2 |
| S  | 181.972 | Italian Dressing | Level 2 |       | 100   | 8.6  | 8.6   | 9.8  | 3 | 182    | 2.57   | 1.9     | 0.025    | 205   | 0.0665  | 0.222   | 13.6  | 45.2 |
| S  | 181.972 | Italian Dressing | Level 3 |       | 104   | 4.48 | 4.31  | 9.8  | 3 | 182    | 2.57   | 3.51    | 0.154    | 478   | 0.0665  | 0.222   | 13.6  | 45.2 |
| S  | 181.972 | Vegetable Oil    | Level 1 | Trace | 85.2  | 14.3 | 16.8  | 9.8  | 3 | 15     | 3.4    | 0.125   | 0.0073   | 39.4  | 0.0665  | 0.222   | 13.6  | 45.2 |
| S  | 181.972 | Vegetable Oil    | Level 2 |       | 86.8  | 6.98 | 8.04  | 9.8  | 3 | 15     | 3.4    | 0.225   | 0.0136   | 82.7  | 0.0665  | 0.222   | 13.6  | 45.2 |
| S  | 181.972 | Vegetable Oil    | Level 3 |       | 94.3  | 3.31 | 3.51  | 9.8  | 3 | 15     | 3.4    | 0.59    | 0.0352   | 237   | 0.0665  | 0.222   | 13.6  | 45.2 |
| Zn | 202.548 | Breaded Chicken  | Level 1 |       | 98.8  | 14.9 | 15.1  | 0.98 | 3 | 5.56   | 0.0636 | 0.0506  | 0.00958  | 3.71  | 0.00193 | 0.00642 | 0.393 | 1.31 |
| Zn | 202.548 | Breaded Chicken  | Level 2 |       | 101   | 8.92 | 8.83  | 0.98 | 3 | 5.56   | 0.0636 | 0.0642  | 0.00268  | 7     | 0.00193 | 0.00642 | 0.393 | 1.31 |
| Zn | 202.548 | Breaded Chicken  | Level 3 |       | 97.3  | 7.34 | 7.54  | 0.98 | 3 | 5.56   | 0.0636 | 0.12    | 0.00467  | 17.5  | 0.00193 | 0.00642 | 0.393 | 1.31 |
| Zn | 202.548 | Corn Flakes      | Level 1 |       | 94.3  | 20.8 | 22.1  | 0.98 | 3 | 1.27   | 0.21   | 0.00996 | 0.00115  | 0.784 | 0.00193 | 0.00642 | 0.393 | 1.31 |
| Zn | 202.548 | Corn Flakes      | Level 2 |       | 95    | 8.26 | 8.69  | 0.98 | 3 | 1.27   | 0.21   | 0.0146  | 0.0011   | 1.58  | 0.00193 | 0.00642 | 0.393 | 1.31 |
| Zn | 202.548 | Corn Flakes      | Level 3 |       | 97    | 1.17 | 1.21  | 0.98 | 3 | 1.27   | 0.21   | 0.0255  | 0.000155 | 3.91  | 0.00193 | 0.00642 | 0.393 | 1.31 |
| Zn | 202.548 | Italian Dressing | Level 1 |       | 108   | 4.52 | 4.19  | 0.98 | 3 | -0.112 | 0.144  | 0.0515  | 0.00123  | 9.63  | 0.00193 | 0.00642 | 0.393 | 1.31 |
| Zn | 202.548 | Italian Dressing | Level 2 |       | 104   | 8.62 | 8.29  | 0.98 | 3 | -0.112 | 0.144  | 0.107   | 0.00193  | 21.2  | 0.00193 | 0.00642 | 0.393 | 1.31 |
| Zn | 202.548 | Italian Dressing | Level 3 |       | 106   | 1.92 | 1.81  | 0.98 | 3 | -0.112 | 0.144  | 0.27    | 0.00532  | 49.4  | 0.00193 | 0.00642 | 0.393 | 1.31 |
| Zn | 202.548 | Vegetable Oil    | Level 1 | Trace | 61.4  | 3.02 | 4.92  | 0.98 | 3 | -0.843 | 0.473  | 0.00414 | 0.000414 | 2.61  | 0.00193 | 0.00642 | 0.393 | 1.31 |
| Zn | 202.548 | Vegetable Oil    | Level 2 |       | 79.5  | 3.36 | 4.23  | 0.98 | 3 | -0.843 | 0.473  | 0.0113  | 0.000468 | 5.49  | 0.00193 | 0.00642 | 0.393 | 1.31 |
| Zn | 202.548 | Vegetable Oil    | Level 3 |       | 93.3  | 2.36 | 2.53  | 0.98 | 3 | -0.843 | 0.473  | 0.0363  | 0.00155  | 15.7  | 0.00193 | 0.00642 | 0.393 | 1.31 |

## R Code

Prepare working environment

```
library(tidyverse)
library(lubridate)
library(janitor)
library(ggpmisc)
library(readxl)
library(broom)
library(viridis)
library(scales)
library(ggbeeswarm)
library(patchwork)
library(ggforce)
library(gt)
```

```
my.formula <- y ~ x
```

```
theme_master <- function(base_size=14) {
  library(grid)
  (theme_bw(base_size = base_size)+
    theme(text=element_text(color="black"),
          axis.title=element_text(size = rel(1.3)),
          axis.text=element_text(size = rel(0.8), color = "black"),
          axis.text.x = element_text(angle = 90, vjust = 0.5, hjust = 0.5),
          legend.background=element_rect(fill="transparent"),
          legend.key.size = unit(1, 'lines'),
          strip.text = element_text(size = rel(0.8), color = "black"),
          panel.border=element_rect(color="black",linewidth=1)
    ))
}
```

```
theme_set(theme_master())
```

Single wavelengths for elements of interest

```
single_line <-
c(
  "588.995",
  "766.491",
  "279.800",
  "315.887",
  "257.610",
  "238.204",
  "327.395",
  "202.548",
  "213.618",
  "181.972"
)
```

Reading in data

Reading in supplemental info containing data from reference material certificate of analysis

```

ref_material_info <-
  c("NIST_3233_info",
    "NIST_1845a_info",
    "NIST_1849a_info",
    "NIST_1549a_info",
    "NIST_1577c_info",
    "NIST_1566b_info",
    "NIST_1568b_info",
    "FDA_cocoa_info",
    "3290_info",
    "NMIJ_7405b_info",
    "NRC_dolt-4_info",
    "NIST_2976_info",
    "NRC_dorm-4_info")

RM_info <-
  lst()

RM_info <- lapply(seq_along(ref_material_info), function(x) {
  RM_info[[x]] <-
    read_excel("C:/Users/Jake.Carter/OneDrive - FDA/HomeDrive/Data/ICP
OES/SLV/summary/SLV_summary.xlsx",
              sheet = ref_material_info[x]) %>%
  dplyr::mutate(QC = "Reference material",
               ref_material = ref_material_info[x],
               ref_material = str_replace(ref_material, "_info", ""),
               ref_material = str_replace(ref_material, "NIST_1845a", "1845a"),
               ref_material = str_replace(ref_material, "NIST_1549a", "1549a"),
               ref_material = str_replace(ref_material, "NIST_1849a", "1849a"),
               ref_material = str_replace(ref_material, "NIST_3233", "3233"),
               ref_material = str_replace(ref_material, "NIST_1577c", "1577c"),
               ref_material = str_replace(ref_material, "NIST_1566b", "1566b"),
               ref_material = str_replace(ref_material, "NIST_1568b", "1568b"),
               ref_material = str_replace(ref_material, "NIST_2976", "2976"),
               ref_material = str_replace(ref_material, "NRC_dolt-4", "dolt-4"),
               ref_material = str_replace(ref_material, "NRC_dorm-4", "dorm-4"),
               ref_material = str_replace(ref_material, "FDA_cocoa", "FDA cocoa"))
})

names(RM_info) <- ref_material_info

RM_info <-
  dplyr::bind_rows(RM_info) %>%
  dplyr::rename(certificate_value = certificate_value_mg_kg,
               sample = ref_material) %>%
  dplyr::mutate(QC = "Reference Material")

Read in dilution data

dilutions <-
  read_excel("C:/Users/Jake.Carter/OneDrive - FDA/HomeDrive/Data/ICP
OES/2022/June/20220606/SDA.xlsx",
            sheet = "R") %>%
  dplyr::mutate(replicate = as.character(replicate)) %>%

```

```
tidyr::pivot_longer(cols = Al:Zn, values_to = "c_std", names_to = "symbol") %>%
dplyr::mutate(date = as.character(date))
```

### Dry mass conversion factors for reference material analysis

```
dry_mass <-
read_excel("C:/Users/Jake.Carter/OneDrive - FDA/HomeDrive/Data/ICP
OES/2022/June/20220606/SDA.xlsx",
sheet = "dry_mass") %>%
dplyr::rename(sample = ref_mat) %>%
dplyr::mutate(date = lubridate::ymd(date))
```

Read in fortification dilutions Spike conc. is  $\frac{C_s M_s}{M_x}$

```
FAPs <-
read_excel("C:/Users/Jake.Carter/OneDrive - FDA/HomeDrive/Data/ICP
OES/2022/June/20220606/SDA.xlsx",
sheet = "FAPs") %>%
tidyr::pivot_longer(cols = As:Zn, names_to = "symbol", values_to = "spike_conc") %>%
dplyr::mutate(replicate = as.character(replicate),
date = as.character(date))
```

### Read in data

In this experiment, Lu is in solution one (S1) and is internal standard 1 (IS1). In is in solution two (S2) and is internal standard 2 (IS2).

```
files = list.files(path = "C:/Users/Jake.Carter/OneDrive - FDA/HomeDrive/Data/ICP
OES/2022/June/20220606", pattern="*.csv")
```

```
data <-
readr::read_csv(paste("C:/Users/Jake.Carter/OneDrive - FDA/HomeDrive/Data/ICP
OES/2022/June/20220606/", files[1], sep = ""),
skip = 6) %>%
janitor::clean_names() %>%
dplyr::select(label, element, element_label, date_time, starts_with("intensity_replicate")) %>%
tidyr::pivot_longer(cols = intensity_replicate_1:intensity_replicate_100,
values_to = "intensity",
names_to = "intensity_replicate") %>%
dplyr::mutate(intensity_replicate = str_remove(intensity_replicate, "intensity_replicate_"),
element = str_replace(element, " ", "."),
label = str_replace(label, "d-blk", "blk"),
label = str_replace(label, "fda_cocoa_cp_35", "FDA cocoa"),
date = str_extract(label, "2022-03-09|2022-04-07|2022-02-01"),
label = str_remove(label, "2022-03-09-|2022-04-07-|2022-02-01-"),
sample = str_remove(label, "-10$|-1$|-2$|-3$|-4$|-5$|-6$|-7$|-8$|-9$"),
replicate = str_extract(label, "1$|2$|3$|4$|5$|6$|7$|8$|9$|10$"),
FAP = str_extract(label, "FAP1|FAP2|FAP3"),
FAP = if_else(is.na(FAP),
"Not an FAP",
FAP),
sample = str_remove(sample, "-FAP1|-FAP2|-FAP3"),
QC = if_else(FAP %in% c("FAP1", "FAP2", "FAP3"),
"FAP",
if_else(sample %in% RM_info$sample,
"Reference Material",
```

```

      if_else(sample == "blk",
              "blank",
              "UAP")
    )
  ) %>%
dplyr::rename(symbol = element_label) %>%
dplyr::group_by(element, sample, date_time, replicate) %>%
dplyr::mutate(normalized = intensity/max(intensity)) %>%
dplyr::ungroup() %>%
dplyr::filter(str_detect(label, "rinse", negate = TRUE))

```

```

samples <-
  unique(data$label)

```

```

lines <-
  unique(data$element)

```

We plot raw data and generate linear regressions. Model parameters will be used to determine solution concentrations according to automatic standard dilution analysis

```

sda1 <-
  data %>%
  dplyr::select(-intensity) %>%
  dplyr::filter(element %in% c("Zn.202.548", "In.325.609", "Lu.261.541"),
                str_detect(label, "1577c", negate = FALSE)) %>%
  dplyr::mutate(replicate = paste("Rep. #", replicate, sep = ""),
                replicate = fct_inorder(replicate),
                dig_label = str_replace(date, "2022-02-01", "Dig. 1"),
                dig_label = str_replace(dig_label, "2022-03-09", "Dig. 2"),
                dig_label = str_replace(dig_label, "2022-04-07", "Dig. 3"),
                element = str_replace(element, "In.", "In "),
                element = str_replace(element, "Lu.", "Lu "),
                element = str_replace(element, "Zn.", "Zn "),
                element = paste(element, "(nm)")) %>%
  ggplot(aes(x = as.numeric(intensity_replicate), y = normalized, fill = element, shape = element)) +
  geom_point(size = 1,
             stroke = 0.2) +
  scale_shape_manual(values = c(21,22,23)) +
  guides(fill = guide_legend(override.aes = list(size=2))) +
  scale_fill_viridis_d(option = "turbo", alpha = 0.5) +
  labs(y = "Normalized Intensity",
       x = "Intensity Replicate",
       subtitle = "(a)",
       fill = NULL,
       shape = NULL) +
  facet_grid(dig_label~replicate) +
  theme_master(base_size = 7.5) +
  theme(legend.position = "right",
        panel.grid = element_blank())

```

```

sda1

```

```

sda2 <-
  data %>%
  dplyr::select(-normalized, -symbol) %>%

```

```

dplyr::filter(element %in% c("In.325.609", "Lu.261.541")) %>%
dplyr::mutate(element = str_replace(element, "In.", "In "),
  element = str_replace(element, "Lu.", "Lu "),
  element = str_replace(element, "Zn.", "Zn "),
  element = paste(element, "(nm)")) %>%
tidyr::pivot_wider(names_from = element, values_from = intensity) %>%
dplyr::filter(str_detect(label, "1577c")) %>%
dplyr::mutate(replicate = paste("Rep. #", replicate, sep = ""),
  replicate = fct_inorder(replicate),
  dig_label = str_replace(date, "2022-02-01", "Dig. 1"),
  dig_label = str_replace(dig_label, "2022-03-09", "Dig. 2"),
  dig_label = str_replace(dig_label, "2022-04-07", "Dig. 3")) %>%
ggplot(aes(x = `In 325.609 (nm)`/10^4, y = `Lu 261.541 (nm)`/10^4)) +
geom_point(size = 0.75,
  stroke = 0.2,
  alpha = 0.8,
  shape = 21,
  fill = "gray") +
geom_smooth(method = "lm",
  se = FALSE,
  linewidth = 0.3,
  formula = my.formula,
  color = plasma(1, alpha = 0.75, direction = -1, end = 0.8)) +
stat_poly_eq(formula = my.formula,
  aes(label = paste(..eq.label.., sep = "~~~")),
  size = rel(1.6),
  label.y = c(rep(0.95, 27)),
  label.x = c(rep(0.95, 27)),
  parse = TRUE) +
labs(subtitle = "(b)",
  y = expression(paste("Lu 261.541 (nm) / ", 10^4)),
  x = expression(paste("In 325.609 (nm) / ", 10^4))) +
theme(legend.position = "none") +
facet_grid(dig_label~replicate) +
theme_master(base_size = 7.5) +
theme(panel.grid = element_blank())

```

sda2

sda3 <-

```

data %>%
dplyr::select(-normalized, -symbol) %>%
tidyr::pivot_wider(names_from = element, values_from = intensity) %>%
tidyr::pivot_longer(cols = -starts_with(c("intensity_replicate",
  "sample",
  "date_time",
  "FAP",
  "QC",
  "replicate",
  "date",
  "In",
  "Lu",
  "label")), names_to = "element", values_to = "intensity") %>%
dplyr::filter(element == "Zn.202.548") %>%
dplyr::filter(str_detect(label, "1577c")) %>%
dplyr::mutate(replicate = paste("Rep. #", replicate, sep = "")),

```

```

    replicate = fct_inorder(replicate),
    dig_label = str_replace(date, "2022-02-01", "Dig. 1"),
    dig_label = str_replace(dig_label, "2022-03-09", "Dig. 2"),
    dig_label = str_replace(dig_label, "2022-04-07", "Dig. 3")) %>%
ggplot(aes(x = Lu.261.541/10^4, y = intensity/10^4)) +
geom_point(size = 0.75,
    stroke = 0.2,
    alpha = 0.8,
    shape = 21,
    fill = "gray") +
geom_smooth(method = "lm",
    se = FALSE,
    formula = my.formula,
    linewidth = 0.3,
    color = plasma(1, alpha = 0.75, direction = -1, end = 0.8)) +
stat_poly_eq(formula = my.formula,
    aes(label = paste(..eq.label.., sep = "~~~")),
    size = rel(1.6),
    label.y = c(rep(0.95, 24)),
    parse = TRUE) +
labs(y = expression(paste("Zn 202.548 (nm) / ", 10^4)),
    x = expression(paste("Lu 261.541 (nm) / ", 10^4)),
    subtitle = "(c)") +
theme(legend.position = "none",
    axis.text.x = element_text(angle = 90, vjust = 0.5)) +
facet_grid(dig_label~replicate,
    scales = "free") +
theme_master(base_size = 7.5) +
theme(panel.grid = element_blank())

```

sda3

Code for data vis

sda1/(sda2 + sda3)

Determining automatic SDA parameters

From the text: Solution concentrations were determined according to eq. 1,<sup>1</sup> where  $C_A^{soln}$ ,  $C_A^{std}$ , and  $S_I^{max}$ , is the concentration of the analyte in the sample solution after digestion, the concentration of the analyte in the standard solution, and the maximum signal of IS1, respectively. The intercept and slope in eq. 1 were determined from the linear regression model generated from plotting the signal of the analyte against the signal of IS1.  $S_I^{max}$  was determined from plotting the signal of IS1 against the signal of IS2, fitting a linear regression model, and generating the y-intercept.<sup>1</sup>

$$\text{eq. 1: } C_A^{soln} = \frac{\text{intercept}}{\text{slope}} * \frac{C_A^{std}}{S_I^{max}}$$

Now we compute linear regression parameters (e.g. intercept\_1, intercept\_2, and slope) in batch. Here, intercept\_2 is the same as  $S_I^{max}$

```

line_1_metrics <-
data %>%
dplyr::select(-normalized, -symbol) %>%
tidyr::pivot_wider(names_from = element, values_from = intensity) %>%

```

```

tidyr::pivot_longer(cols = -starts_with(c("label",
      "replicate",
      "sample",
      "date",
      "date_time",
      "QC",
      "FAP",
      "In",
      "Lu")), names_to = "element", values_to = "intensity") %>%
dplyr::rename(intstd_1 = Lu.261.541) %>%
dplyr::select(-starts_with(c("In.", "Lu"))) %>%
tidyr::nest(data = c("intensity_replicate", "intstd_1", "intensity")) %>%
mutate(
  fit = map(data, ~ lm(intensity ~ intstd_1, data = .x)),
  tidied = map(fit, tidy)
) %>%
unnest(tidied) %>%
dplyr::select(-fit)

intercept_1 <-
line_1_metrics %>%
dplyr::filter(term == "(Intercept)") %>%
dplyr::rename(metric = estimate) %>%
dplyr::select(label, element, metric, sample, replicate, FAP, QC, date, date_time) %>%
dplyr::mutate(term = "intercept_1")

slope_1 <-
line_1_metrics %>%
dplyr::filter(term == "intstd_1") %>%
dplyr::rename(metric = estimate) %>%
dplyr::select(label, element, metric, sample, replicate, FAP, QC, date, date_time) %>%
dplyr::mutate(term = "slope_1")

intstd_metrics <-
data %>%
dplyr::select(-normalized, -symbol) %>%
tidyr::pivot_wider(names_from = element, values_from = intensity) %>%
tidyr::pivot_longer(cols = -starts_with(c("intensity_replicate",
      "replicate",
      "sample",
      "date",
      "date_time",
      "QC",
      "FAP",
      "In",
      "Lu",
      "label")), names_to = "element", values_to = "intensity") %>%
dplyr::rename(intstd_1 = Lu.261.541,
  intstd_2 = In.325.609) %>%
dplyr::select(-starts_with(c("In.", "Lu")), -intensity) %>%
distinct() %>%
tidyr::nest(data = c("intensity_replicate", "intstd_1", "intstd_2")) %>%
mutate(
  fit = map(data, ~ lm(intstd_1 ~ intstd_2, data = .x)),
  tidied = map(fit, tidy)
)

```

```
) %>%  
unnest(tidied)
```

```
intercept_2 <-  
  intstd_metrics %>%  
  dplyr::filter(term == "(Intercept)") %>%  
  dplyr::rename(metric = estimate) %>%  
  dplyr::select(label, element, metric, sample, replicate, FAP, QC, date, date_time) %>%  
  dplyr::mutate(term = "intercept_2")
```

Combine all relevant parameters into one data tibble

```
sda_metrics <-  
  intercept_1 %>%  
  dplyr::bind_rows(slope_1, intercept_2) %>%  
  tidyr::pivot_wider(names_from = term, values_from = metric) %>%  
  dplyr::mutate(symbol = str_remove(element, "[:digit:]+[:digit:]+")  
  ) %>%  
  dplyr::left_join(dilutions) %>%  
  dplyr::mutate(c_soln = (intercept_1/slope_1) * (c_std/intercept_2),  
    c_sample = c_soln * dil_samp_factor) %>%  
  dplyr::arrange(element, label) %>%  
  dplyr::left_join(RM_info)
```

Blank analysis

One of the blanks has high Fe. More than likely used wrong solution or severe contamination

```
data %>%  
  dplyr::select(-intensity) %>%  
  dplyr::filter(element %in% c("Fe.238.204", "In.325.609", "Lu.261.541"),  
    str_detect(label, "blk", negate = FALSE)) %>%  
  dplyr::mutate(replicate = paste("Rep. #", replicate, sep = ""),  
    replicate = fct_inorder(replicate)) %>%  
  ggplot(aes(x = as.numeric(intensity_replicate), y = normalized, fill = element)) +  
  geom_point(alpha = 0.5,  
    shape = 21,  
    size = 1) +  
  scale_fill_viridis_d(option = "turbo", alpha = 0.5) +  
  labs(y = "Normalized intensity",  
    x = "Intensity Replicate",  
    fill = NULL) +  
  facet_grid(date~replicate) +  
  theme_master(base_size = 6) +  
  theme(legend.position = "top")
```

Determining figures of merit

```
FOM <-  
  sda_metrics %>%  
  dplyr::mutate(remove = if_else(  
    sample == "blk" & replicate == 1 & date == "2022-04-07" & symbol == "Fe",  
    "remove",  
    "keep"  
  )) %>%  
  dplyr::filter(sample == "blk",  
    remove == "keep") %>%
```

```

dplyr::group_by(element) %>%
dplyr::summarize(LOQ = 10*sd(c_sample),
  LOD = 3*sd(c_sample),
  ASDL = 3*sd(c_soln),
  ASQL = 10*sd(c_soln),
  n = n())

```

## Code for data processing

```

sda_metrics %>%
dplyr::mutate(remove = if_else(
  sample == "blk" & replicate == 1 & date == "2022-04-07" & symbol == "Fe",
  "remove",
  "keep"
)) %>%
dplyr::filter(sample == "blk",
  remove == "keep") %>%
dplyr::group_by(element) %>%
dplyr::summarize(LOQ = signif(10*sd(c_sample), 2),
  LOD = signif(3*sd(c_sample), 2),
  ASDL = signif(3*sd(c_soln), 2),
  ASQL = signif(10*sd(c_soln), 2),
  n = n()) %>%
dplyr::mutate(symbol = str_remove(element, "[:digit:]+[:digit:]+"),
  element = str_replace(element, "[^[:alpha:]]", ""),
  element = str_replace(element, "[:alpha:]", ""),
  element = str_replace(element, "[:alpha:]", "")) %>%
dplyr::filter(element %in% single_line) %>%
dplyr::mutate(element = paste(element, " nm", sep = "")) %>%
dplyr::rename(Element = symbol,
  line = element,
  `LOQ (mg/kg)` = LOQ,
  `LOD (mg/kg)` = LOD,
  `ASDL (mg/kg)` = ASDL,
  `ASQL (mg/kg)` = ASQL) %>%
dplyr::mutate(Element = paste(Element, line, sep = " ")) %>%
dplyr::select(Element, `ASDL (mg/kg)`, `ASQL (mg/kg)`, `LOD (mg/kg)`, `LOQ (mg/kg)`) %>%
gt()

```

## Joining FOM to data

```

data_out <-
data %>%
dplyr::group_by(label, element) %>%
dplyr::summarize(ratio = max(intensity)/min(intensity)) %>%
dplyr::ungroup() %>%
dplyr::right_join(sda_metrics,
  multiple = "all") %>%
dplyr::left_join(FOM %>%
  dplyr::select(-n)) %>%
dplyr::mutate(element = str_replace(element, "[^[:alpha:]]", ""),
  element = str_replace(element, "[:alpha:]", ""),
  element = str_replace(element, "[:alpha:]", ""),
  multiple = "all") %>%
dplyr::left_join(FAPs) %>%
dplyr::mutate(date = lubridate::ymd(date))

```

## Reference material analysis

### Reference material results summary

```
ref_mat_summary <-  
  data_out %>%  
  dplyr::filter(QC == "Reference Material") %>%  
  dplyr::mutate(rec = c_sample/certificate_value*100) %>%  
  dplyr::left_join(dry_mass) %>%  
  dplyr::group_by(element, sample, date) %>%  
  dplyr::summarize(symbol = symbol,  
    mean_conc = mean(c_sample),  
    sd_conc = sd(c_sample),  
    mean_conc_soln = mean(c_soln),  
    sd_conc_soln = sd(c_soln),  
    c_std = c_std,  
    n = n(),  
    certificate_value = certificate_value,  
    certified = certified,  
    coverage_factor = coverage_factor,  
    plus_minus = plus_minus,  
    mean_rec = mean(rec*dry_mass_correction),  
    sd_rec = sd(rec*dry_mass_correction),  
    sigma_2_rec = 2*sd(rec*dry_mass_correction),  
    dry_mass_correction = dry_mass_correction,  
    mean_ratio = mean(ratio),  
    mean_slope = mean(slope_1),  
    LOQ = LOQ,  
    LOD = LOD,  
    ASDL = ASDL,  
    ASQL = ASQL) %>%  
  dplyr::distinct() %>%  
  dplyr::mutate(  
    samp_uncert = (mean_conc * dry_mass_correction * 10)/100, # Set to 10 % nominal uncertainty  
    z_score = (mean_conc * dry_mass_correction - certificate_value)/(sqrt((samp_uncert^2) +  
    ((plus_minus/coverage_factor)^2)))  
  ) %>%  
  dplyr::arrange(element, sample) %>%  
  dplyr::ungroup()
```

### Solution concentrations plotted against certified values

```
refmat1 <-  
  ref_mat_summary %>%  
  dplyr::filter(mean_conc_soln > ASQL,  
    element %in% single_line,  
    !is.na(z_score),  
    certified == "certified",  
    mean_conc_soln/c_std < 10) %>%  
  ggplot(aes(x = certificate_value, y = (mean_conc * dry_mass_correction), fill = symbol, group = 1)) +  
  geom_point(size = 0.5,  
    shape = 21,  
    stroke = 0.2) +  
  geom_smooth(method = "lm",  
    se = FALSE,  
    formula = my.formula,
```

```

    linewidth = 0.25,
    lty = 2,
    show.legend = FALSE,
    color = plasma(1, alpha = 0.75, direction = -1, end = 0.8)) +
stat_poly_eq(formula = my.formula,
  aes(label = paste(..eq.label..., ..rr.label..., sep = "~~~")),
  size = rel(2),
  rr.digits = 3,
  label.x = 0.175,
  label.y = 0.945,
  parse = TRUE) +
geom_abline(slope = 1,
  size = 0.25) +
scale_fill_viridis_d(option = "turbo",
  alpha = 0.8) +
guides(shape = guide_legend(override.aes = list(size=2)),
  fill = "none") +
annotate("text", -Inf, Inf, label = "(a)", hjust = -0.2, vjust = 1.5) +
labs(y = "Found Conc. (mg/kg)",
  x = "Certified Conc. (mg/kg)",
  fill = NULL) +
theme_master(base_size = 8) +
theme(axis.text.x = element_text(angle = 0),
  legend.position = "none",
  panel.grid = element_blank(),
  plot.margin=unit(c(0,5,5,0),"pt"))

```

refmat1

## Z score summary

```

refmat2 <-
ref_mat_summary %>%
dplyr::filter(mean_conc_soln > ASQL,
  element %in% single_line,
  !is.na(z_score),
  certified == "certified",
  mean_conc_soln/c_std < 10) %>%
ggplot(aes(x = "All Elements", y = z_score, fill = symbol, group = 1)) +
geom_hline(yintercept = c(-2,2),
  size = 0.25) +
geom_hline(yintercept = 0,
  lty = 2,
  size = 0.25) +
geom_quasirandom(size = 0.5,
  shape = 21,
  stroke = 0.2,
  width = 0.25) +
geom_boxplot(width = 0.5,
  lwd = 0.2,
  show.legend = FALSE,
  outlier.shape = NA,
  fill = "transparent") +
scale_fill_viridis_d(alpha = 0.8,
  option = "turbo") +
guides(shape = guide_legend(override.aes = list(size=2)),

```

```

    fill = "none") +
  annotate("text", -Inf, Inf, label = "(b)", hjust = -0.2, vjust = 2) +
  labs(y = "Z Score",
       x = NULL,
       fill = NULL) +
  theme_master(base_size = 8) +
  theme(axis.text.x = element_text(angle = 0),
        axis.title.x = element_blank(),
        legend.position = "none",
        panel.grid = element_blank(),
        plot.margin=unit(c(0,0,0,0),"pt"))

```

refmat2

refmat3 <-

```

ref_mat_summary %>%
  dplyr::filter(mean_conc_soln > ASQL,
                element %in% single_line,
                !is.na(z_score),
                certified == "certified",
                mean_conc_soln/c_std < 10) %>%
  dplyr::group_by(element) %>%
  dplyr::mutate(n = n(),
                label = paste(symbol, " (n=", n, ")", sep = "")) %>%
  ggplot(aes(x = symbol, y = z_score, fill = symbol, group = symbol)) +
  geom_hline(yintercept = c(-2,2),
             size = 0.25) +
  geom_hline(yintercept = 0,
             lty = 2,
             size = 0.25) +
  geom_quasirandom(size = 0.5,
                  stroke = 0.2,
                  shape = 21,
                  width = 0.25) +
  geom_boxplot(width = 0.5,
              lwd = 0.2,
              show.legend = FALSE,
              outlier.shape = NA,
              fill = "transparent") +
  scale_fill_viridis_d(alpha = 0.8,
                       option = "turbo") +
  guides(shape = guide_legend(override.aes = list(size=2)),
         fill = "none") +
  annotate("text", -Inf, Inf, label = "(c)", hjust = -0.2, vjust = 2) +
  labs(y = "Z Score",
       x = NULL,
       fill = NULL) +
  theme_master(base_size = 8) +
  theme(axis.text.x = element_text(angle = 0),
        axis.title.x = element_blank(),
        legend.position = "none",
        panel.grid = element_blank(),
        plot.margin=unit(c(0,5,0,0),"pt"))

```

refmat3

What about variability

```
refmat4 <-
  ref_mat_summary %>%
  dplyr::filter(mean_conc_soln > ASQL,
    element %in% single_line,
    !is.na(z_score),
    certified == "certified",
    mean_conc_soln/c_std < 10) %>%
  dplyr::mutate(RSD = sd_conc/mean_conc * 100) %>%
  dplyr::group_by(element) %>%
  dplyr::mutate(n = n(),
    label = paste(symbol, " (n=", n, ")", sep = "")) %>%
  ggplot(aes(x = symbol, y = RSD, fill = symbol, group = symbol)) +
  geom_quasirandom(size = 0.5,
    stroke = 0.2,
    shape = 21,
    width = 0.25) +
  geom_boxplot(width = 0.5,
    lwd = 0.2,
    show.legend = FALSE,
    outlier.shape = NA,
    fill = "transparent") +
  geom_hline(yintercept = 10,
    size = 0.25) +
  scale_fill_viridis_d(alpha = 0.8,
    option = "turbo") +
  guides(shape = guide_legend(override.aes = list(size=2)),
    fill = "none") +
  annotate("text", -Inf, Inf, label = "(d)", hjust = -0.2, vjust = 1.5) +
  labs(y = "RSD (%)",
    x = NULL,
    fill = NULL) +
  theme_master(base_size = 8) +
  theme(axis.text.x = element_text(angle = 0),
    axis.title.x = element_blank(),
    legend.position = "none",
    panel.grid = element_blank(),
    plot.margin=unit(c(0,0,0,0),"pt"))
```

refmat4

Table format for Z score range. Removing outliers based on 1.5 interquartile range

```
ref_mat_summary %>%
  dplyr::filter(mean_conc_soln > ASQL,
    element %in% single_line,
    !is.na(z_score),
    certified == "certified",
    mean_conc_soln/c_std < 10) %>%
  dplyr::ungroup() %>%
  dplyr::mutate(IQR = IQR(z_score),
    percentile_25 = quantile(z_score, 0.25),
    percentile_75 = quantile(z_score, 0.75),
    min_threshold = percentile_25 - 1.5*IQR,
    max_threshold = percentile_75 + 1.5*IQR) %>%
```

```
#dplyr::filter(z_score >= min_threshold & z_score <= max_threshold) %>%
dplyr::summarize(`Z score min` = signif(min(z_score), 2),
  `Z score max` = signif(max(z_score), 2),
  `Median Z score` = signif(median(z_score), 2),
  n = n()) %>%
```

```
gt()
```

```
ref_mat_summary %>%
```

```
dplyr::filter(mean_conc_soln > ASQL,
  element %in% single_line,
  !is.na(z_score),
  certified == "certified",
  mean_conc_soln/c_std < 10) %>%
```

```
dplyr::ungroup() %>%
```

```
dplyr::mutate(IQR = IQR(z_score),
  percentile_25 = quantile(z_score, 0.25),
  percentile_75 = quantile(z_score, 0.75),
  min_threshold = percentile_25 - 1.5*IQR,
  max_threshold = percentile_75 + 1.5*IQR) %>%
```

```
dplyr::filter(z_score >= min_threshold & z_score <= max_threshold) %>%
```

```
dplyr::summarize(`Z score min` = signif(min(z_score), 2),
  `Z score max` = signif(max(z_score), 2),
  `Median Z score` = signif(median(z_score), 2),
  n = n()) %>%
```

```
gt()
```

Code for data vis

```
(refmat1 + refmat2)/(refmat3 + refmat4)
```

Fortified analytical portions (FAP)s analysis

Let's do FAP calculations

```
sample_metrics <-
```

```
data_out %>%
```

```
dplyr::filter(QC == "UAP") %>%
```

```
dplyr::group_by(element, sample, date) %>%
```

```
dplyr::summarize(symbol = symbol,
  mean_conc = mean(c_sample),
  sd_conc = sd(c_sample),
  mean_conc_soln = mean(c_soln),
  sd_conc_soln = sd(c_soln),
  c_std = mean(c_std),
  LOQ = LOQ,
  LOD = LOD,
  ASQL = ASQL,
  ASDL = ASDL)
```

eq 2:  $Recovery (\%) = \left( \frac{C_{x+s} - C_x}{\frac{C_s M_s}{M_x}} \right) * 100$ , where  $C_{x+s}$ ,  $C_x$ ,  $C_s$ ,  $M_s$ , and  $M_x$ , is the concentration

determined in the spiked sample, concentration determined in the unspiked sample, concentration of the spiking solution, mass of the spike solution, mass of the analytical sample portion, respectively

```

FAP_replicates <-
  data_out %>%
  dplyr::filter(!QC %in% c("Reference Material", "blank", "UAP")) %>%
  dplyr::left_join(sample_metrics,
    multiple = "all") %>%
  distinct() %>%
  dplyr::mutate(
    net_sample = if_else(
      mean_conc < LOD,
      c_sample,
      c_sample - mean_conc
    ),
    rec = net_sample/spike_conc*100
  ) %>%
  dplyr::arrange(symbol, element, label, FAP)

```

### Summary FAP data

```

FAP_replicates_summary <-
FAP_replicates %>%
  dplyr::filter(element %in% single_line) %>%
  dplyr::group_by(element, sample, FAP) %>%
  dplyr::summarize(mean_rec = mean(rec),
    sd_rec = sd(rec),
    sigma_2_rec = 2*sd(rec),
    n = n(),
    mean_c_sample = mean(c_sample),
    sd_c_sample = sd(c_sample),
    mean_conc = mean_conc,
    sd_conc = sd_conc,
    mean_spike_soln = mean(spike_conc),
    mean_conc_soln = mean(c_soln),
    sd_conc_soln = sd(c_soln),
    n = n(),
    c_std = c_std,
    LOD = LOD,
    LOQ = LOQ,
    ASDL = ASDL,
    ASQL = ASQL,
    symbol = symbol) %>%
  distinct() %>%
  dplyr::ungroup()

```

We plot results from individual replicates against the fortified concentrations

```

FAP1 <-
  FAP_replicates %>%
  dplyr::filter(element %in% single_line,
    c_soln > ASQL,
    c_soln/c_std < 10) %>%
  dplyr::mutate(n = n(),
    n = as.character(n)
  ) %>%
  ggplot(aes(x = spike_conc, y = net_sample, fill = symbol, group = 1)) +
  geom_point(size = 0.75,
    stroke = 0.2,

```

```

    shape = 21) +
geom_smooth(method = "lm",
  se = FALSE,
  formula = my.formula,
  linewidth = 0.25,
  lty = 2,
  show.legend = FALSE,
  color = plasma(1, alpha = 0.75, direction = -1, end = 0.8)) +
stat_poly_eq(formula = my.formula,
  aes(label = paste(..eq.label.., ..rr.label.., sep = "~~~")),
  size = rel(2),
  rr.digits = 3,
  label.x = 0.175,
  label.y = 0.945,
  parse = TRUE) +
geom_abline(slope = 1,
  size = 0.25) +
scale_fill_viridis_d(option = "turbo",
  alpha = 0.8) +
guides(shape = guide_legend(override.aes = list(size=2)),
  fill = "none") +
annotate("text", -Inf, Inf, label = "(a)", hjust = -0.2, vjust = 1.5) +
labs(y = "Found Conc. (mg/kg)",
  x = "Fortified Conc. (mg/kg)",
  fill = NULL) +
theme_master(base_size = 8) +
theme(axis.text.x = element_text(angle = 0),
  legend.position = "none",
  panel.grid = element_blank(),
  plot.margin=unit(c(0,5,5,0),"pt"))

```

FAP1

We look at the summary

```

FAP2 <-
FAP_replicates_summary %>%
dplyr::filter(mean_conc_soln > ASQL,
  mean_conc_soln/c_std < 10) %>%
ggplot(aes(x = "All Elements", y = mean_rec, fill = symbol, group = 1)) +
geom_quasirandom(width = 0.25,
  stroke = 0.2,
  shape = 21,
  size = 0.75) +
geom_boxplot(outlier.shape = NA,
  fill = "transparent",
  show.legend = FALSE,
  lwd = 0.25,
  width = 0.5) +
scale_fill_viridis_d(option = "turbo",
  alpha = 0.8) +
geom_hline(yintercept = 120,
  linetype = 1,
  size = 0.25) +
geom_hline(yintercept = 80,
  linetype = 1,

```

```

      size = 0.25) +
geom_hline(yintercept = 100,
           linetype = 2,
           size = 0.25) +
guides(shape = guide_legend(override.aes = list(size=2)),
       fill = "none") +
annotate("text", -Inf, Inf, label = "(b)", hjust = -0.2, vjust = 2) +
labs(x = NULL,
     fill = NULL,
     shape = NULL,
     y = "Mean Recovery (%)") +
theme_master(base_size = 8) +
theme(axis.text.x = element_text(angle = 0),
      legend.position = "none",
      panel.grid = element_blank(),
      plot.margin=unit(c(0,0,0,0),"pt"))

```

FAP2

Recoveries by element

FAP3 <-

```

FAP_replicates_summary %>%
dplyr::filter(mean_conc_soln/c_std < 10,
              mean_conc_soln > ASQL) %>%
dplyr::group_by(element) %>%
dplyr::mutate(n = n(),
              label = paste(symbol, " (n=", n, ")", sep = ""))
) %>%
ggplot(aes(x = symbol, y = mean_rec, fill = symbol, group = symbol)) +
geom_quasirandom(width = 0.25,
                 stroke = 0.2,
                 shape = 21,
                 size = 0.75) +
geom_boxplot(outlier.shape = NA,
             fill = "transparent",
             show.legend = FALSE,
             lwd = 0.25,
             width = 0.5) +
scale_fill_viridis_d(option = "turbo",
                     alpha = 0.8) +
geom_hline(yintercept = 120,
           linetype = 1,
           size = 0.25) +
geom_hline(yintercept = 80,
           linetype = 1,
           size = 0.25) +
geom_hline(yintercept = 100,
           linetype = 2,
           size = 0.25) +
guides(shape = guide_legend(override.aes = list(size=2)),
       fill = "none") +
annotate("text", -Inf, Inf, label = "(c)", hjust = -0.2, vjust = 2) +
labs(x = NULL,
     fill = NULL,
     shape = NULL,

```

```

y = "Mean Recovery (%)" +
theme_master(base_size = 8) +
theme(axis.text.x = element_text(angle = 0),
      legend.position = "none",
      panel.grid = element_blank(),
      plot.margin=unit(c(0,5,0,0),"pt"))

```

FAP3

Variability by element

```

FAP4 <-
FAP_replicates_summary %>%
dplyr::filter(mean_conc_soln/c_std < 10,
              mean_conc_soln > ASQL) %>%
dplyr::group_by(element) %>%
dplyr::mutate(n = n(),
              label = paste(symbol, " (n=", n, ")", sep = ""))
) %>%
ggplot(aes(x = symbol, y = sd_rec/mean_rec*100, fill = symbol, group = symbol)) +
geom_quasirandom(width = 0.25,
                 stroke = 0.2,
                 shape = 21,
                 size = 0.75) +
geom_boxplot(outlier.shape = NA,
             show.legend = FALSE,
             lwd = 0.25,
             fill = "transparent",
             width = 0.5) +
scale_fill_viridis_d(option = "turbo",
                    alpha = 0.8) +
geom_hline(yintercept = 10,
           linetype = 1,
           size = 0.25) +
guides(shape = guide_legend(override.aes = list(size=2)),
       fill = "none") +
annotate("text", -Inf, Inf, label = "(d)", hjust = -0.2, vjust = 1.5) +
labs(x = NULL,
     fill = NULL,
     shape = NULL,
     y = "RSD (%)") +
theme_master(base_size = 8) +
theme(axis.text.x = element_text(angle = 0),
      legend.position = "none",
      panel.grid = element_blank(),
      plot.margin=unit(c(0,0,0,0),"pt"))

```

FAP4

Code for data vis

(FAP1 + FAP2)/(FAP3 + FAP4)

Table format for FAP recovery range. Removing outliers based on 1.5 interquartile range

```

FAP_replicates_summary %>%
  dplyr::filter(mean_conc_soln/c_std < 10,
    mean_conc_soln > ASQL) %>%
  dplyr::ungroup() %>%
  dplyr::mutate(IQR = IQR(mean_rec),
    percentile_25 = quantile(mean_rec, 0.25),
    percentile_75 = quantile(mean_rec, 0.75),
    min_threshold = percentile_25 - 1.5*IQR,
    max_threshold = percentile_75 + 1.5*IQR) %>%
  #dplyr::filter(mean_rec >= min_threshold & mean_rec <= max_threshold) %>%
  dplyr::summarize(`Recovery min (%)` = signif(min(mean_rec), 2),
    `Recovery max (%)` = signif(max(mean_rec), 2),
    `Recovery mean (%)` = signif(mean(mean_rec), 2),
    `Mean +/- 2sigma (%)` = paste(signif(mean(mean_rec), 2), " +/- ", signif(2*sd(mean_rec), 2)),
    n = n()) %>%
  gt()

```

```

FAP_replicates_summary %>%
  dplyr::filter(mean_conc_soln/c_std < 10,
    mean_conc_soln > ASQL) %>%
  dplyr::ungroup() %>%
  dplyr::mutate(IQR = IQR(mean_rec),
    percentile_25 = quantile(mean_rec, 0.25),
    percentile_75 = quantile(mean_rec, 0.75),
    min_threshold = percentile_25 - 1.5*IQR,
    max_threshold = percentile_75 + 1.5*IQR) %>%
  dplyr::filter(mean_rec >= min_threshold & mean_rec <= max_threshold) %>%
  dplyr::summarize(`Recovery min (%)` = signif(min(mean_rec), 2),
    `Recovery max (%)` = signif(max(mean_rec), 2),
    `Recovery mean (%)` = signif(mean(mean_rec), 2),
    `Mean +/- 2sigma (%)` = paste(signif(mean(mean_rec), 2), " +/- ", signif(2*sd(mean_rec), 2)),
    n = n()) %>%
  gt()

```

## Determining automatic SDA working range

```

metrics_paramters <-
  sda_metrics %>%
  dplyr::filter(QC == "Reference Material") %>%
  dplyr::mutate(date = lubridate::ymd(date),
    element = str_replace(element, "[^[:alpha:]]", ""),
    element = str_replace(element, "[:alpha:]", ""),
    element = str_replace(element, "[:alpha:]", "")) %>%
  dplyr::bind_rows(
    FAP_replicates
  ) %>%
  dplyr::left_join(dry_mass) %>%
  dplyr::mutate(
    rec = if_else(QC == "Reference Material",
      (c_sample*dry_mass_correction)/certificate_value * 100,
      rec)
  ) %>%
  dplyr::group_by(date, sample, symbol, element) %>%
  dplyr::summarize(
    mean_rec = mean(rec),
    sd_rec = sd(rec),

```

```

mean_c_sample = mean(c_sample),
sd_c_sample = sd(c_sample),
mean_c_soln = mean(c_soln),
sd_c_soln = sd(c_soln),
c_std = mean(c_std),
mean_slope = mean(slope_1),
mean_intercept = mean(intercept_1),
n = n()
) %>%
dplyr::left_join(
  FOM %>%
dplyr::mutate(element = str_replace(element, "[^:alpha:]", ""),
              element = str_replace(element, "[:alpha:]", ""),
              element = str_replace(element, "[:alpha:]", "")) %>%
  dplyr::select(-n),
  by = "element"
) %>%
dplyr::mutate(ratio = mean_c_soln/c_std) %>%
tidyr::pivot_longer(cols = c(ratio, mean_intercept, mean_slope),
                    names_to = "metric",
                    values_to = "value") %>%
dplyr::mutate(rec_factor = if_else(
  mean_rec >= 80 & mean_rec <= 120,
  "accept",
  "decline"
))

metrics1 <-
metrics_paramters %>%
dplyr::filter(element %in% single_line,
              mean_c_soln > ASQL) %>%
tidyr::pivot_wider(names_from = "metric",
                  values_from = "value") %>%
ggplot(aes(mean_slope, mean_rec, fill = rec_factor, shape = rec_factor, size = rec_factor)) +
geom_point(stroke = 0.15) +
geom_linerange(aes(ymax = mean_rec + sd_rec,
                  ymin = mean_rec - sd_rec),
              size = 0.15) +
scale_shape_manual(values = c(21,22)) +
scale_size_manual(values=c(1, 1.4)) +
coord_cartesian(ylim = c(60, 160)) +
scale_fill_viridis_d(option = "turbo",
                    alpha = 0.5,
                    begin = 0.1,
                    end = 0.75) +
geom_hline(yintercept = c(80, 120),
           size = 0.25) +
geom_hline(yintercept = 100,
           lty = 2,
           size = 0.25) +
labs(y = "Mean Recovery +/- Stdev. (%)",
     x = expression(italic("Slope")),
     subtitle = "(d)",
     size = NULL,
     shape = NULL,
     color = NULL,

```

```

fill = NULL) +
theme_master(base_size = 9) +
theme(legend.position = "none",
      panel.grid = element_blank())

```

metrics1

```

metrics2 <-
metrics_paramters %>%
dplyr::filter(element %in% single_line,
              mean_c_soln > ASQL) %>%
tidyr::pivot_wider(names_from = "metric",
                  values_from = "value") %>%
ggplot(aes(mean_intercept, mean_rec, fill = rec_factor, shape = rec_factor, size = rec_factor)) +
geom_point(stroke = 0.15) +
coord_cartesian(ylim = c(60, 160)) +
geom_linerange(aes(ymin = mean_rec - sd_rec,
                  ymax = mean_rec + sd_rec,
                  size = 0.15) +
scale_size_manual(values=c(1, 1.4)) +
scale_shape_manual(values = c(21,22)) +
scale_fill_viridis_d(option = "turbo",
                    alpha = 0.5,
                    begin = 0.1,
                    end = 0.75) +
geom_hline(yintercept = c(80, 120),
           size = 0.25) +
geom_hline(yintercept = 100,
           lty = 2,
           size = 0.25) +
scale_x_log10() +
labs(y = "Mean Recovery +/- Stdev. (%)",
     x = expression(italic("Intercept")*" ("*Log[10]*" Scale)"),
     subtitle = "(c)",
     size = NULL,
     shape = NULL,
     fill = NULL) +
theme_master(base_size = 9) +
theme(legend.position = "none",
      panel.grid = element_blank())

```

metrics2

```

metrics3 <-
metrics_paramters %>%
dplyr::filter(element %in% single_line,
              mean_c_soln > ASQL) %>%
tidyr::pivot_wider(names_from = "metric",
                  values_from = "value") %>%
ggplot(aes(ratio, mean_rec, fill = rec_factor, shape = rec_factor, size = rec_factor)) +
geom_point(stroke = 0.25) +
coord_cartesian(ylim = c(60, 160)) +
scale_shape_manual(values = c(21,22)) +
geom_linerange(aes(ymin = mean_rec - sd_rec,
                  ymax = mean_rec + sd_rec,
                  size = 0.15) +

```

```

scale_size_manual(values=c(1, 1.4),
  labels = percent) +
scale_fill_viridis_d(option = "turbo",
  alpha = 0.5,
  begin = 0.1,
  end = 0.75) +
geom_hline(yintercept = c(80, 120),
  size = 0.25) +
geom_hline(yintercept = 100,
  lty = 2,
  size = 0.25) +
annotate("text", -Inf, Inf, label = "(a)", hjust = -0.2, vjust = 1.5) +
labs(y = "Mean Recovery +/- Stdev. (%)",
  x = NULL,
  size = NULL,
  shape = NULL,
  fill = NULL) +
theme_master(base_size = 12) +
theme(legend.position = "none",
  panel.grid = element_blank(),
  axis.title = element_blank(),
  plot.margin=unit(c(0,0,5,0),"pt"))

```

metrics3

```

metrics4 <-
metrics_paramters %>%
dplyr::filter(element %in% single_line,
  mean_c_soln > ASQL) %>%
tidyr::pivot_wider(names_from = "metric",
  values_from = "value") %>%
ggplot(aes(ratio, mean_rec, fill = rec_factor, shape = rec_factor, size = rec_factor)) +
geom_point(stroke = 0.25) +
geom_linerange(aes(ymin = mean_rec - sd_rec,
  ymax = mean_rec + sd_rec,
  size = 0.15) +
scale_size_manual(values=c(1, 1.4)) +
scale_shape_manual(values = c(21,22)) +
scale_fill_viridis_d(option = "turbo",
  alpha = 0.5,
  begin = 0.1,
  end = 0.75) +
geom_hline(yintercept = c(80, 120),
  size = 0.15) +
geom_hline(yintercept = 100,
  lty = 2,
  size = 0.15) +
coord_cartesian(xlim = c(0, 1),
  ylim = c(60, 140),
  expand = FALSE) +
scale_y_continuous(breaks = seq(60, 140, 40)) +
annotate("text", -Inf, Inf, label = "(b)", hjust = -0.2, vjust = 1.5) +
labs(y = "Mean Recovery +/- Stdev. (%)",
  x = expression("Soln. Conc./Std. Conc."),
  shape = NULL,
  size = NULL,

```

```

fill = NULL) +
theme_master(base_size = 12) +
theme(legend.position = "none",
      panel.grid = element_blank(),
      axis.title = element_blank(),
      plot.margin=unit(c(0,0,0,0),"pt"))

```

metrics4

Code for data vis

Edit according to peer reviewer

```

result <- metrics3/metrics4
gt <- patchwork::patchworkGrob(result)

```

plot\_for\_save <-

```

gridExtra::grid.arrange(gt, left = "Mean Recovery +/- Stdev. (%)", bottom = "Soln. Conc./Std. Conc.")

```

Code for data vis

```

data %>%
dplyr::select(-intensity) %>%
dplyr::filter(element %in% c("Zn.202.548", "In.325.609", "Lu.261.541"),
              str_detect(label, "1566b|1577c|veg-oil-FAP1", negate = FALSE)) %>%
dplyr::mutate(replicate = paste("Rep. #", replicate, sep = ""),
              replicate = fct_inorder(replicate),
              dig_label = str_replace(date, "2022-02-01", "Dig. 1"),
              dig_label = str_replace(dig_label, "2022-03-09", "Dig. 2"),
              dig_label = str_replace(dig_label, "2022-04-07", "Dig. 3"),
              element = str_replace(element, "In.", "In "),
              element = str_replace(element, "Lu.", "Lu "),
              element = str_replace(element, "Zn.", "Zn "),
              element = paste(element, "(nm)")
              ) %>%
dplyr::filter(dig_label == "Dig. 2",
              replicate == "Rep. #1") %>%
ggplot(aes(x = as.numeric(intensity_replicate), y = normalized, fill = element, shape = element)) +
geom_point(size = 1,
           stroke = 0.1) +
scale_shape_manual(values = c(21,22,23)) +
annotate("text", x = 50.5, y = 0.85, label = "NIST 1566b", size = 1.5) +
annotate("text", x = 50.5, y = 0.52, label = "NIST 1577c", size = 1.5) +
annotate("text", x = 50.5, y = 0.055, label = "Veg. Oil FAP", size = 1.5) +
annotate("rect", xmin = 24.5, xmax = 43.5, ymin = 0, ymax = 1,
         alpha = .25,fill = "gray") +
annotate("rect", xmin = 58.5, xmax = 77.5, ymin = 0, ymax = 1,
         alpha = .25,fill = "gray") +
annotate("rect", xmin = 94.5, xmax = 100.5, ymin = 0, ymax = 1,
         alpha = .25,fill = "gray") +
annotate("segment", x = 18, xend = 25, y = 0.5, yend = 0.5, size = 0.25,) +
annotate("text", x = 10, y = 0.505, label = "SDA region", size = 2) +
scale_fill_viridis_d(option = "turbo", alpha = 0.5) +
guides(fill = guide_legend(override.aes = list(size=2))) +
#geom_hline(yintercept = 0.75) +
labs(y = "Normalized Intensity",

```

```

x = "Intensity Replicate",
fill = NULL,
shape = NULL) +
theme_master(base_size = 8) +
theme(legend.position = "top",
      panel.grid = element_blank(),
      legend.title=element_blank(),
      legend.margin = margin(0, 0, 0, 0),
      legend.spacing.x = unit(0, "mm"),
      legend.spacing.y = unit(0, "mm"),
      plot.margin=unit(c(0,0,0,0),"pt"))

working_range <-
ref_mat_summary %>%
dplyr::filter(element %in% single_line,
              mean_conc_soln > ASQL) %>%
dplyr::select(element,
              symbol,
              sample,
              mean_conc,
              sd_conc,
              mean_rec,
              sd_rec,
              sigma_2_rec,
              mean_conc_soln,
              c_std,
              LOD,
              LOQ,
              ASDL,
              ASQL) %>%
dplyr::rename(mean_c_sample = mean_conc,
              sd_c_sample = sd_conc) %>%
dplyr::mutate(QC = "Reference Material") %>%
dplyr::bind_rows(
  FAP_replicates_summary %>%
  dplyr::filter(mean_conc_soln > ASQL) %>%
dplyr::select(element,
              symbol,
              sample,
              mean_c_sample,
              mean_rec,
              sd_rec,
              sigma_2_rec,
              mean_conc_soln,
              c_std,
              LOD,
              LOQ,
              ASDL,
              ASQL) %>%
dplyr::mutate(QC = "Fortified Sample")
) %>%
dplyr::filter(!is.na(mean_rec)) %>%
dplyr::mutate(range = if_else(
  mean_rec >= 80 & mean_rec <= 120,
  "inside",
  "outside"

```

```

    )) %>%
dplyr::group_by(symbol, range) %>%
dplyr::mutate(min_range = signif(min(mean_conc_soln/c_std), 2),
             max_range = signif(max(mean_conc_soln/c_std), 2)
             ) %>%
dplyr::ungroup()

```

### Code for data processing

```

range <-
  working_range %>%
  dplyr::select(symbol, range, min_range, max_range) %>%
  dplyr::filter(range == "inside") %>%
  dplyr::select(symbol, min_range, max_range) %>%
  dplyr::distinct()

dilutions %>%
  dplyr::select(symbol, c_std) %>%
  dplyr::filter(symbol %in% data_out$symbol) %>%
  dplyr::distinct() %>%
  dplyr::slice_head(n = 10) %>% # duplicates each entry so remove the first set of values
  dplyr::right_join(range) %>%
  dplyr::mutate(min_soln_conc = signif(c_std * min_range, 2),
              max_conc_soln = signif(c_std * max_range, 2),
              min_samp_conc = signif(c_std * min_range*200, 2),
              max_samp_conc = signif(c_std * max_range*200, 2),
              c_std = signif(c_std, 2)
              ) %>%
  dplyr::rename(min_ratio = min_range,
              max_ratio = max_range) %>%
  gt()

```

### Code for data processing

```

ref_mat_summary %>%
  dplyr::filter(element %in% single_line) %>%
  dplyr::mutate(across(-c("symbol", "certificate_value", "plus_minus", "sample", "element", "date",
"certified"), ~signif(., digits = 3))) %>%
  dplyr::mutate(FOM = if_else(
    mean_conc_soln > ASQL,
    "",
    if_else(
      mean_conc_soln <= ASQL & mean_conc_soln > ASDL,
      "Trace",
      "< LOD"
    )
  ),
  ),
  `RSD (%)` = signif(sd_conc/mean_conc*100, digits = 3) %>%
  dplyr::select(symbol, element, sample, certified, FOM, mean_conc, sd_conc, `RSD (%)`, c_std, n,
z_score, certificate_value, plus_minus, mean_conc_soln, sd_conc_soln, ASDL, ASQL, LOD, LOQ) %>%
  dplyr::arrange(symbol, sample) %>%
  dplyr::rename(`Wavelength (nm)` = element,
              Element = symbol,
              Certificate = certified,
              `Z Score` = z_score,
              `Standard Concentration (mg/kg)` = c_std,

```

```

`Certificate Value (mg/kg)` = certificate_value,
`Certificate Uncertainty (mg/kg)` = plus_minus,
`Reference Material` = sample,
`Figure of Merit Indicator` = FOM,
`Conc. Mean (mg/kg)` = mean_conc,
`Conc. Stdev. (mg/kg)` = sd_conc,
`Soln. Conc. Mean (mg/kg)` = mean_conc_soln,
`Soln. Conc. Stdev. (mg/kg)` = sd_conc_soln,
`Analytical Solution Detection Limit (ASDL)` = ASDL,
`Analytical Solution Quantitation Limit (ASQL)` = ASQL,
`Limit of Detection (LOD)` = LOD,
`Limit of Quantitation (LOQ)` = LOQ
)

```

### Code for data processing

```

FAP_replicates_summary %>%
  dplyr::mutate(across(-c("symbol", "sample", "element", "FAP"), ~signif(., digits = 3))) %>%
  dplyr::mutate(FOM = if_else(
    mean_conc_soln > ASQL,
    "",
    if_else(
      mean_conc_soln <= ASQL & mean_conc_soln > ASDL,
      "Trace",
      "< LOD"
    )
  ),
),
`RSD (%)` = signif(sd_rec/mean_rec*100, digits = 3) %>%
  dplyr::select(symbol, element, sample, FAP, FOM, mean_rec, sd_rec, `RSD (%)`, c_std, n, mean_conc,
sd_conc, mean_conc_soln, sd_conc_soln, mean_spike_soln, ASDL, ASQL, LOD, LOQ) %>%
  dplyr::arrange(symbol, sample, FAP) %>%
  dplyr::mutate(FAP = str_replace(FAP, "FAP1", "Level 1"),
    FAP = str_replace(FAP, "FAP2", "Level 2"),
    FAP = str_replace(FAP, "FAP3", "Level 3"),
    FAP = factor(FAP, levels = c("Level 1", "Level 2", "Level 3")),
    sample = str_replace(sample, "breaded-chicken", "Breaded Chicken"),
    sample = str_replace(sample, "corn-flakes", "Corn Flakes"),
    sample = str_replace(sample, "italian-dressing", "Italian Dressing"),
    sample = str_replace(sample, "veg-oil", "Vegetable Oil")) %>%
  dplyr::rename(`Wavelength (nm)` = element,
    Element = symbol,
    Sample = sample,
    `Standard Concentration (mg/kg)` = c_std,
    `Fortified Analytical Portion (FAP) Level` = FAP,
    `Figure of Merit Indicator` = FOM,
    `Recovery Mean (%)` = mean_rec,
    `Recovery Stdev. (%)` = sd_rec,
    `Native Conc. Mean (mg/kg)` = mean_conc,
    `Native Conc. Stdev. (mg/kg)` = sd_conc,
    `Soln. Conc. Mean (mg/kg)` = mean_conc_soln,
    `Soln. Conc. Stdev. (mg/kg)` = sd_conc_soln,
    `Spike Conc. (mg/kg)` = mean_spike_soln,
    `Analytical Solution Detection Limit (ASDL)` = ASDL,
    `Analytical Solution Quantitation Limit (ASQL)` = ASQL,
    `Limit of Detection (LOD)` = LOD,

```

```
`Limit of Quantitation (LOQ)` = LOQ
)
```

Time saved

```
analysis_time <-
  data_out %>%
  dplyr::mutate(date_time = mdy_hms(date_time)) %>%
  dplyr::arrange(date_time) %>%
  dplyr::distinct(label, date_time)
```

```
analysis_time
```

Total number of solutions analyzed in one batch

```
nrow(analysis_time)
```

The total time in hours to run 120 solutions

```
time_length(
  interval(
    analysis_time %>%
      dplyr::slice(1) %>%
      dplyr::pull(date_time),
    analysis_time %>%
      dplyr::slice(120) %>%
      dplyr::pull(date_time)
  ),
  unit = "hour"
)
```

And what is the time in minutes between two successive solutions

```
time_length(
  interval(analysis_time %>%
    dplyr::slice(1) %>%
    dplyr::pull(date_time),
    analysis_time %>%
    dplyr::slice(2) %>%
    dplyr::pull(date_time)
  ),
  unit = "minute"
)
```

```
time_length(
  interval(analysis_time %>%
    dplyr::slice(59) %>%
    dplyr::pull(date_time),
    analysis_time %>%
    dplyr::slice(60) %>%
    dplyr::pull(date_time)
  ),
  unit = "minute"
)
```

```
time_length(
  interval(analysis_time %>%
```

```
dplyr::slice(119) %>%  
dplyr::pull(date_time),  
analysis_time %>%  
dplyr::slice(120) %>%  
dplyr::pull(date_time)  
)  
unit = "minute"  
)
```

## References

1. J. T. Sloop, H. J. B. Bonilla, T. Harville, B. T. Jones and G. L. Donati, *Talanta*, 2019, **205**, 120160.

## Packages and system information

```
sessionInfo()
```
